# Supplementary material
Source: PubMed Central journal article supplement (PMC5893147)
Supplement: NIHMS951965-supplement-Document_S2.pdf [file NIHMS951965-supplement-Document_S2.pdf]

# Molecular Cell

## A Long Noncoding RNA Regulates Sister Chromatid Cohesion

### Graphical Abstract

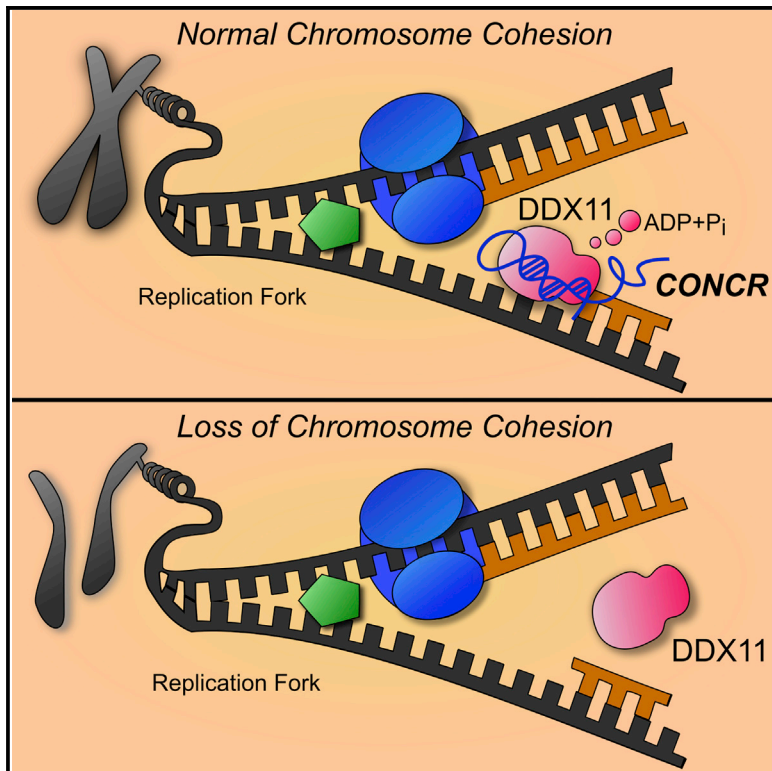

### Authors

Francesco P. Marchese, Elena Grossi, Oskar Marín-Béjar, ..., Alicia Amadoz, Robert M. Brosh, Jr., Maite Huarte

### Correspondence

maitehuarte@unav.es

### In Brief

Marchese et al. identify *CONCR*, a human long noncoding RNA transcriptionally activated by MYC and upregulated in multiple cancer types. *CONCR* is involved in cell cycle progression, DNA replication, and sister chromatid cohesion by interacting with and regulating the activity of the helicase DDX11.

### Highlights

- *CONCR* is a human lncRNA activated by MYC and upregulated in multiple cancer types
- *CONCR* expression is periodic and required for cell division and survival
- Inactivation of *CONCR* causes severe defects in sister chromatid cohesion
- *CONCR* modulates the activity of the helicase DDX11

### Accession Numbers

GSE81602

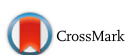

# A Long Noncoding RNA Regulates Sister Chromatid Cohesion

Francesco P. Marchese,<sup>1,2</sup> Elena Grossi,<sup>1,2</sup> Oskar Marín-Béjar,<sup>1,2</sup> Sanjay Kumar Bharti,<sup>3</sup> Ivan Raimondi,<sup>1,2</sup> Jovanna González,<sup>1,2</sup> Dannys Jorge Martínez-Herrera,<sup>1,2</sup> Alejandro Athie,<sup>1,2</sup> Alicia Amadoz,<sup>1,2,4</sup> Robert M. Brosh, Jr.,<sup>3</sup> and Maite Huarte<sup>1,2,\*</sup>

<sup>1</sup>Center for Applied Medical Research (CIMA), Department of Gene Therapy and Regulation of Gene Expression, University of Navarra, 55 Pio XII Avenue, 31008 Pamplona, Spain

<sup>2</sup>Institute of Health Research of Navarra (IdiSNA), 31008 Pamplona, Spain

<sup>3</sup>Laboratory of Molecular Gerontology, National Institute on Aging, National Institutes of Health, NIH Biomedical Research Center, 251 Bayview Boulevard, Baltimore, MD 21224, USA

<sup>4</sup>Present address: Computational Genomics Department, Centro de Investigación Príncipe Felipe (CIPF), 46012 Valencia, Spain

\*Correspondence: [maitehuarte@unav.es](mailto:maitehuarte@unav.es)

<http://dx.doi.org/10.1016/j.molcel.2016.06.031>

## SUMMARY

Long noncoding RNAs (lncRNAs) are involved in diverse cellular processes through multiple mechanisms. Here, we describe a previously uncharacterized human lncRNA, *CONCR* (*cohesion regulator noncoding RNA*), that is transcriptionally activated by MYC and is upregulated in multiple cancer types. The expression of *CONCR* is cell cycle regulated, and it is required for cell-cycle progression and DNA replication. Moreover, cells depleted of *CONCR* show severe defects in sister chromatid cohesion, suggesting an essential role for *CONCR* in cohesion establishment during cell division. *CONCR* interacts with and regulates the activity of DDX11, a DNA-dependent ATPase and helicase involved in DNA replication and sister chromatid cohesion. These findings unveil a direct role for an lncRNA in the establishment of sister chromatid cohesion by modulating DDX11 enzymatic activity.

## INTRODUCTION

The human genome is known to encode thousands of RNA transcripts, the majority of which do not produce proteins and are referred to as noncoding RNAs (ncRNAs). Among this class of gene products, the largest group is represented by RNAs longer than 200 nt and with mRNA-like characteristics (5'-cap and 3'-polyA), known as long noncoding RNAs (lncRNAs) (Harrow et al., 2012). Long noncoding RNAs represent more than 25% of all human genes (GENCODE v24), although only a small number of them have been functionally characterized to date. LncRNAs described until now have been shown to be involved in the most diverse cellular processes, such as cell growth and apoptosis, cell pluripotency, and differentiation, through multiple and diverse mechanisms (Bonasio and Shiekhattar, 2014; Fatica and Bozzoni, 2014; Rinn and Chang, 2012). Moreover, our work and that of others has shown that lncRNAs are key regulators of

cell transformation and, in some cases, direct transcriptional targets of well-known tumor suppressor and oncogenic factors, such as p53 (Huarte, 2015; Sánchez et al., 2014) and MYC (Hart et al., 2014; Kim et al., 2015).

Faithful DNA replication and proper sister chromatid cohesion ensure the correct propagation of the genetic material to daughter cells during cell division. A large number of factors involved in these processes have been identified and characterized (Masai et al., 2010; Peters and Nishiyama, 2012), as well as their alterations associated with genome instability and eventually tumorigenesis (Gaillard et al., 2015; Losada, 2014; Skibbens et al., 2013). Among these factors is DEAD/H box protein 11 (DDX11), a DNA-dependent ATPase and helicase involved in the processing of the lagging strand during DNA replication and in the maintenance of the fork structure for the establishment of cohesion (Bharti et al., 2014; Parish et al., 2006). Mutations in DDX11 have been in fact associated with a rare pathological condition known as Warsaw breakage syndrome, a syndrome characterized at the cellular level by sister chromatid cohesion defects (Capo-Chichi et al., 2013; van der Lelij et al., 2010).

Although we have a large knowledge of the proteins involved in DNA replication and cohesion, the involvement of lncRNAs in these processes remains undetermined. Here, we describe a human lncRNA, which regulates DNA replication and sister chromatid cohesion by modulating the activity of the helicase DDX11. The expression of the lncRNA is directly linked with the ability of tumor cells to proliferate, conferring them with increased malignancy.

## RESULTS

### *CONCR* Is Negatively Regulated by p53 and Activated by MYC

p53 is a master regulator of cellular homeostasis that inhibits uncontrolled cell proliferation. Consistently with the known function of p53, p53<sup>-/-</sup> cells bypass cell-cycle arrest caused by DNA damage (Kaeser et al., 2004). In order to identify lncRNAs involved in this process, we searched for those with altered expression in cells with impaired p53. To do this, we performed polyA<sup>+</sup> RNA sequencing of p53<sup>-/-</sup> and p53<sup>+/+</sup> HCT116 cells

either untreated or treated with the DNA-damaging drug 5-FU. By comparing the expression values of each transcript identified in HCT116 p53<sup>-/-</sup> and p53<sup>+/+</sup> cells, we ranked those transcripts in which expression levels were significantly greater in the absence of p53 both in the presence and absence of DNA damage. We identified 4,143 mRNAs that showed increased expression in p53<sup>-/-</sup> compared to p53<sup>+/+</sup> cells, with functions related to cell cycle, mitosis, DNA repair, and DNA replication (Table S1). Similarly, we identified 81 lncRNAs with induced expression in p53<sup>-/-</sup> cells (Table S1), and we hypothesized their involvement in cell-cycle progression.

Among the lncRNAs identified by our analysis, we found an lncRNA previously annotated as *DDX11 antisense RNA 1* (*DDX11-AS1*), which is a divergent non-overlapping transcript of the protein-coding gene *DDX11*, that we named “*cohesion regulator noncoding RNA*,” or *CONCR* (Figure 1A). *CONCR* showed greater levels in HCT116 p53<sup>-/-</sup> compared to wild-type cells (Figure 1B and Table S1). This anti-correlation between p53 and *CONCR* was confirmed in A549 cells depleted of p53 by RNAi both in the presence or absence of treatment with DNA-damaging drugs, 5-FU or doxorubicin (Figures 1C, S1A, and S1B), suggesting that absence of p53 causes an increase in *CONCR* expression.

p53 is known to regulate gene expression both by direct transcriptional activation and by indirect effects on cellular pathways and transcription factors that in turn become active or inactive (Fischer et al., 2014; Rinn and Huarte, 2011). Analysis of the promoter region of *CONCR* failed to identify a p53-binding motif. Consistently, we could not find any evidence of binding in the promoter region by p53 chromatin immunoprecipitation sequencing (ChIP-seq) analysis (Sánchez et al., 2014), suggesting that the lower level of expression of *CONCR* observed in p53<sup>+/+</sup> cells may be the result of indirect p53-dependent repression. In contrast, the analysis of the promoter region of *CONCR* identified two canonical E-box CACGTG binding motifs for the transcription factor MYC (Sabò and Amati, 2014) (Figure 1D), which has been described as transcriptionally repressed in a p53-dependent manner (Ho et al., 2005; Sachdeva et al., 2009). Indeed, ChIP-seq data from ENCODE showed that MYC is bound to *CONCR* promoter region in multiple cell types (Figure 1D). Furthermore, *CONCR* was significantly identified by RNA sequencing (RNA-seq) as upregulated in response to MYC overexpression in the human B cell line P493-6 (Hart et al., 2014) (Figure 1E), while inhibition of MYC by RNAi in HCT116 and array analysis (Kim et al., 2015) showed downregulation of *CONCR* (Figure 1F). Similarly, when we silenced MYC in A549, we observed a significant decrease in the level of *CONCR* (Figure 1G). Since both p53 and MYC are well known to regulate cell cycle, to exclude that changes in *CONCR* levels were indirectly due to cell-cycle deregulation, we silenced E2F1, a transcription factor involved in the control of cell-cycle progression from G1 to S-phase (Biswas and Johnson, 2012), observing, as expected, that cell cycle was affected, while *CONCR* levels were not (Figures S1C and S1D). Although it remains difficult to discriminate between the causes and consequences of perturbations of the cell cycle, altogether these data suggest that *CONCR* is transcriptionally regulated by

MYC, and the greater levels of *CONCR* following p53 depletion may be ascribed to the transcriptional activity of MYC.

*CONCR* is ubiquitously expressed in a panel of different human cell lines (Figure S1E). We confirmed by qRT-PCR the presence of three different transcriptional isoforms of *CONCR*, as annotated in GENCODE v23, although the isoform comprising the first two exons (ENST00000618041.1) is the most abundant in the cell (>10-fold), and its 5' and 3' ends are confirmed by 5' cap gene expression (CAGE) analysis and the presence of a polyadenylation signal, respectively (Figures S1F and S1G). The noncoding nature of *CONCR* lncRNA was confirmed by the lack of significant open reading frames (Table S1) and its low coding potential (Figure S1H). *CONCR* is a predominantly nuclear lncRNA, shown by sub-cellular fractionation (Figure 1H) and RNA FISH with two independent oligonucleotide probes (Figures 1I and 1J). To control for the specificity of the RNA FISH probes, we silenced *CONCR* by RNAi and quantified the number of fluorescent foci. Results showed significant reduction in the number of *CONCR* foci following knockdown of the lncRNA, confirming specific binding of the probes to *CONCR* (Figures 1I and S1I–S1L).

### **CONCR Is Upregulated in Multiple Cancer Types**

The relationship observed for *CONCR* with p53 and MYC suggests an implication of the lncRNA in cancer. We determined the levels of *CONCR* across hundreds of tumors and adjacent normal tissues from different cancer types using publicly available data derived from the computational analysis of RNA sequencing (Iyer et al., 2015). *CONCR* expression was significantly greater in the majority of cancer types analyzed (9 out of 12) when comparing tumor specimens with healthy tissue-paired samples (Figure 2A and Table S2). Moreover, when the mutational status of p53 was taken into account, the expression level of *CONCR* appeared significantly greater in tumors with mutations in the *TP53* gene compared to tumors presenting the wild-type gene (Figure 2B). Therefore, *CONCR* presents greater levels of expression in cancer as a result of the mutational status and impaired functionality of p53. We then investigated the ability of cells to form tumors in a mouse xenograft model dependent on the presence or absence of *CONCR*. For this, an equal number of HCT116 cells depleted of *CONCR* or control cells were injected subcutaneously in immunocompromised mice and tumor growth was followed for the indicated time (Figure 2C). Results showed that *CONCR* knockdown affects the ability of cells to form tumors when comparing tumor sizes of mice injected with cells transfected with a control siRNA or *CONCR*-targeting siRNAs (Figures 2C and 2D), suggesting that *CONCR* contributes to tumor growth.

### **Expression of CONCR Is Periodic in the Cell Cycle and Is Required for Efficient Cell Division and Survival**

To investigate the biological function of *CONCR*, we conducted loss-of-function studies using RNAi-mediated depletion of the lncRNA. Cells were transfected with two independent siRNAs targeting *CONCR*, alone or in combination, a scrambled oligonucleotide as a control, or left untransfected (Figure 3A). Cells depleted of *CONCR* were assayed for their proliferation ability, apoptosis, and cell-cycle progression. A significant reduction in the number of proliferating cells was observed following

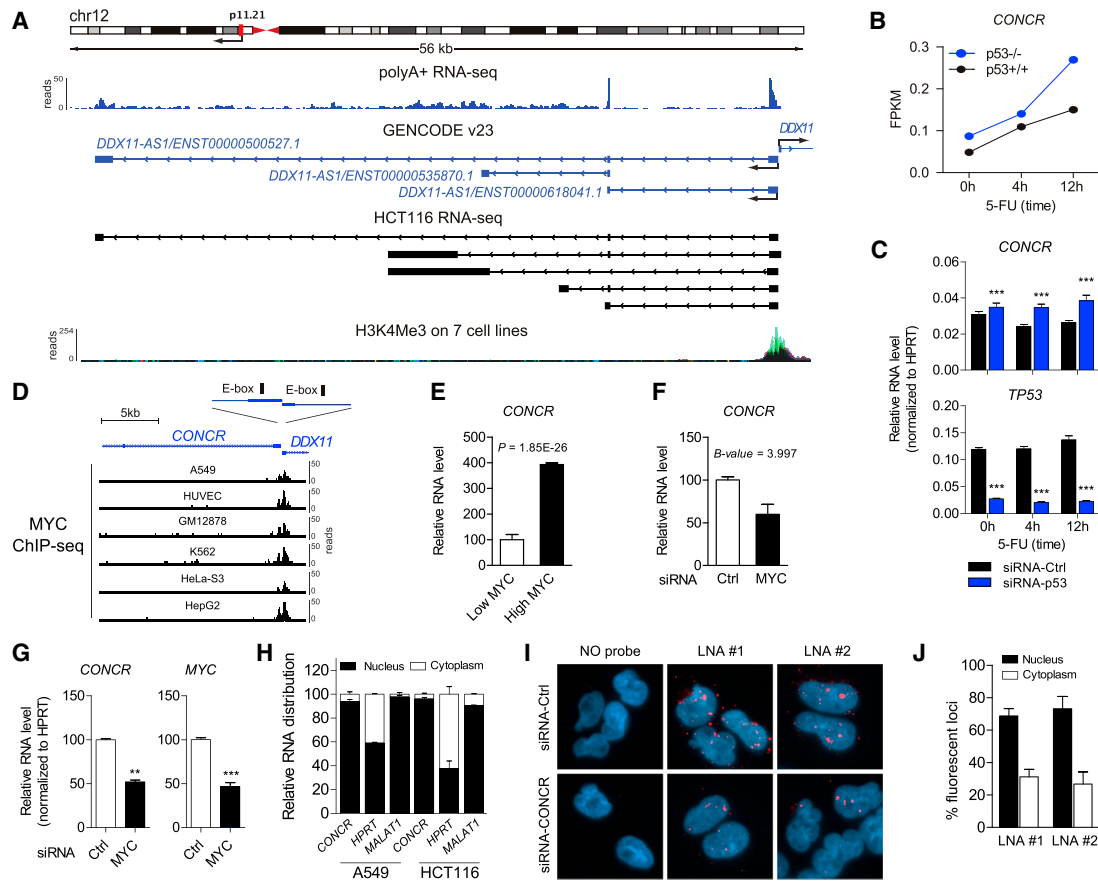

**Figure 1. *CONCR* Is a Nuclear lncRNA Negatively Regulated by p53 and Activated by MYC**

(A) *CONCR* genomic locus. Ideogram of location on chromosome 12; RNA expression detected by whole-cell polyA+ RNA-seq of A549 from ENCODE/CSHL; structure and directionality of *CONCR* (*DDX11-AS1*) and its neighbor gene *DDX11* as annotated in GENCODE v23; RNA structures identified by RNA-seq in HCT116; and H3K4me3 mark on seven cell lines from ENCODE defining active transcription.

(B) *CONCR* expression level determined by polyA+ RNA-seq of p53<sup>-/-</sup> and p53<sup>+/+</sup> HCT116 cells either untreated or treated with the DNA-damaging drug 5-FU for 4 and 12 hr.

(C) *CONCR* and *TP53* expression levels determined by qRT-PCR of A549 cells transfected with a control siRNA (siRNA-Ctrl) or with a siRNA-targeting *TP53* (siRNA-p53), either untreated or treated with the DNA-damaging drug 5-fluorouracil (5-FU), for 4 and 12 hr. Graph shows mean  $\pm$  SEM of three independent experiments.

(D) Schematic of the location of the E-box CACGTG motifs in the promoter region of *CONCR-DDX11*; MYC binding to the promoter region determined by ChIP-seq in different cell lines (ENCODE/SYDH and ENCODE/OpenChrom-UTA).

(E) *CONCR* relative expression level determined by polyA+ RNA-seq in the human B cell line P493-6 expressing either low or high levels of *MYC* (Hart et al., 2014). Graph shows mean  $\pm$  SEM of values and significance as reported in the original study (Hart et al., 2014).

(F) *CONCR* relative expression level determined by microarray in HCT116 depleted of MYC by RNAi (Kim et al., 2015). Graph shows mean  $\pm$  SEM of values and significance as reported in the original study (Kim et al., 2015).

(G) *CONCR* and *MYC* RNA levels determined by qRT-PCR in A549 depleted or not of MYC by RNAi.

(H) Relative subcellular localization of *CONCR* and control RNAs, i.e., *HPRT* and *MALAT1*, determined by nucleus/cytoplasm fractionation and qRT-PCR of A549 and HCT116. Graph shows mean  $\pm$  SD of two independent experiments.

(I) RNA FISH of A549 transfected with a control siRNA (siRNA-Ctrl) or with a combination of two siRNAs targeting *CONCR* (siRNA-*CONCR*) using two independent LNA probes (LNA #1 and #2) or a no probe condition as control.

(J) Percentage of fluorescent foci detected by RNA FISH in the nucleus or in the cytoplasm of siRNA-Ctrl cells as in (I). Fluorescent foci were quantified by imaging and counting approximately 100 cells per condition. Graph shows mean  $\pm$  SD of two independent experiments.

See also Figure S1 and Table S1.

depletion of *CONCR* (Figure 3B), concurrent with an increase in the number of apoptotic cells (Figure 3C) and with the number of cells blocked at the G0/G1 phases of the cell cycle (Figure 3D), suggesting a potential role for *CONCR* in cell division and survival.

To gain insight into the function of *CONCR*, we used microarray technology to analyze gene expression changes in cells depleted of *CONCR* compared to cells transfected with a control siRNA. We identified approximately 500 genes affected by *CONCR* inhibition ( $B > 0$ ), both coding and noncoding (Table



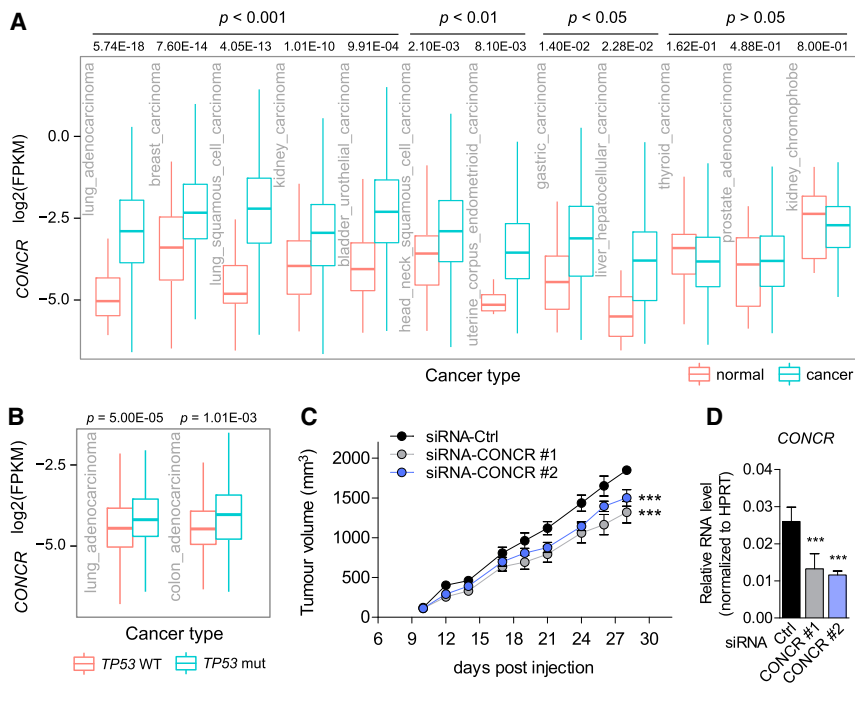

**Figure 2. CONCR Is Upregulated in Multiple Cancer Types**

(A) *CONCR* expression level in paired normal-cancer samples of different cancer types. Data were obtained from <http://mitranscriptome.org> (Iyer et al., 2015). Significance was determined by Welch's t test (Table S2).

(B) *CONCR* expression level determined in lung adenocarcinoma and colon adenocarcinoma RNA-seq data available through the TCGA database (<https://gdc-portal.nci.nih.gov>), i.e., LUAD and COAD datasets (Table S2). Expression was compared in each cancer type between tumor samples from individuals bearing mutations in *TP53* and those with the wild-type gene. Significance was determined by unpaired Student's t test.

(C) HCT116 cells transfected with *CONCR*-targeting siRNAs (#1 and #2) or with a control siRNA subcutaneously injected in immunodeficient mice (n = 6 per experimental condition). Tumor volume was measured at the indicated times. Graph shows mean ± SEM of n = 6 mice per experimental condition. Significance was determined by one-way ANOVA and Bonferroni Multiple Comparison Test comparing to siRNA-Ctrl.

(D) *CONCR* knockdown efficiencies in cells used in (C) were determined by qRT-PCR.

See also Table S2.

S3 and Figure S2A). Moreover, gene ontology analysis identified a significant enrichment in pathways related to apoptosis and cell cycle progression, including downregulation of numerous genes involved in the G1 to S-phase transition of the cell cycle (Figure S2B) consistent with a functional role of *CONCR* in these processes and in agreement with the phenotype observed.

The observation that silencing of *CONCR* affected cell cycle progression (Figure 3D) prompted us to investigate the expression of the lncRNA across the different phases of the cell cycle. Cells were therefore synchronized in G1/S by double thymidine block and synchrony of cells monitored by flow cytometry of propidium iodide-stained cells. Analysis of the RNA content at the different time points showed that *CONCR* expression was periodic, with peaks of expression matching with the mid-late G1 phase of the cell cycle (Figures 3E and 3F). Expression levels of well-known periodic genes, such as *CCNE1* (peaks in G1), *CCNA2* (peaks in G2), and *CCNB1* (peaks in M), were used as controls (Figures S2C–S2E). Similar results were obtained by RNA FISH (Figure 3G). Moreover, silencing of *CONCR* followed by double thymidine block and release as before showed a clear impairment in the ability of cells to S-phase re-start, with a large proportion of cells found to be delayed when compared to siRNA-control transfected cells (Figure 3F).

To further investigate the nature of the delay observed for *CONCR*-depleted cells in cell-cycle progression, we performed an experiment of bromodeoxyuridine (BrdU) pulse labeling. *CONCR* was silenced and replicating DNA labeled with a 20-min pulse of BrdU. Cells were then collected and analyzed for BrdU incorporation by flow cytometry (Figure 3H). BrdU incorporation into newly synthesized DNA was significantly reduced in *CONCR*-depleted cells compared to control cells (Figure 3H), suggesting an involvement of *CONCR* in DNA replication.

Altogether, the results obtained suggest that the expression of *CONCR* is tightly regulated across the cell cycle and its presence is required for efficient G1/S transition and DNA replication.

### Cells Depleted of *CONCR* Show Severe Defects in Sister Chromatid Cohesion

In order to gain more insight into *CONCR* function, we performed a correlation analysis using RNA-seq data from 495 samples, including normal and tumor tissues (Cancer Genome Atlas Research Network, 2014). This analysis indicated that most of the genes co-expressed with *CONCR* (correlation value > 0.45) encode for proteins known to be involved in DNA replication and chromosome maintenance (Figures S2F and S2G and Table S4), including *DDX11* and several of its interacting partners, such as *TIMELESS* (Cali et al., 2016), *ESPL1*, and components of the minichromosome maintenance complex (MCM) (Figure S2H). This, together with the known function of *DDX11* in sister chromatid cohesion, prompted us to investigate the functional role of *CONCR* in this process.

Interestingly, *CONCR* depletion caused a dramatic increase in the percentage of cells with sister chromatid cohesion loss consistently observed with two independent siRNAs (Figures 4A–4C). Cohesion loss was found to affect entire metaphases rather than sparse sister chromatids within different metaphases, while the degree of the cohesion defect varied from loosely paired to more widely separated chromatids, referred to as “loss of cohesion” (Figure 4A, ii–v), in contrast with the canonical X-shaped conformation observed in the control cells (Figure 4A, i). Similarly, loss in sister chromatid cohesion was also observed when the protein-coding gene *DDX11* was silenced by RNAi as expected and previously described (Farina

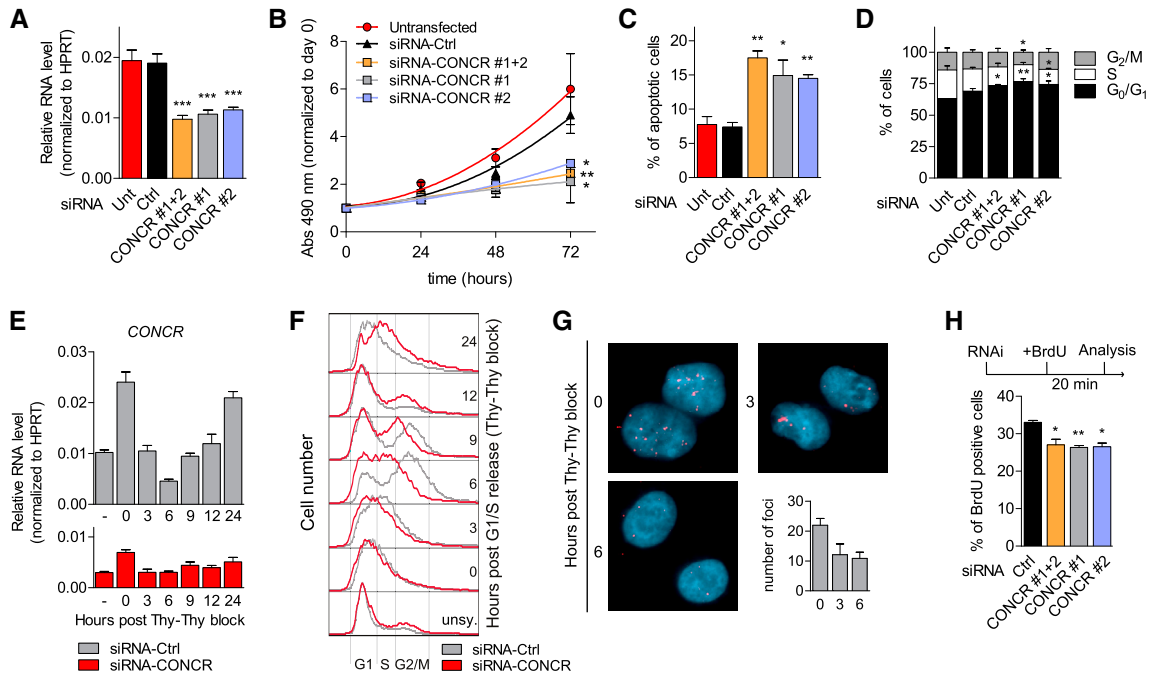

**Figure 3. *CONCR* Expression Is Periodic in the Cell Cycle and Necessary for Cell Division and Proliferation**

(A–D) A549 cells left untransfected (Unt), transfected with a control siRNA (Ctrl), or with two siRNAs targeting *CONCR*, separately (#1 and #2) or in combination (#1+2). Graphs show mean  $\pm$  SEM of at least three independent experiments. Significance was determined comparing to siRNA-Ctrl.

(A) RNA knockdown efficiencies determined by qRT-PCR.

(B) Cell proliferation measured by MTS assay.

(C) Percentage of apoptotic cells determined by flow cytometry of annexin V and 7-AAD stained cells.

(D) Analysis of cell-cycle phase distribution by flow cytometry of propidium iodide-stained cells.

(E and F) A549 cells either transfected with a control siRNA (Ctrl) or with two siRNAs targeting *CONCR* in combination. G1/S synchronized cells obtained by double thymidine block procedure. Normal medium was then used for the release, and cells collected at the different time points indicated for *CONCR* expression analysis by qRT-PCR (E) and cell-cycle analysis (F). (E) Graph shows mean  $\pm$  SD of two independent experiments, while in (F) cell-cycle profiles of one representative experiment are shown.

(G) *CONCR* RNA-FISH performed on A549 cells G1/S synchronized and released as before using LNA #2 probe. Fluorescent foci were quantified on  $\sim$ 100 cells per condition. Graph shows mean  $\pm$  SD of two independent experiments.

(H) Percentage of A549 BrdU-positive cells (20 min BrdU pulse) transfected with the indicated siRNAs. Graph shows mean  $\pm$  SD of three independent experiments.

See also Figure S2 and Table S3.

et al., 2008; Parish et al., 2006) (Figures 4B and 4D). In both cases, i.e., *CONCR* and *DDX11* knockdown (Figures 4C, 4D, and S3A), cell death was observed following RNAi-mediated silencing, reaching 30% of apoptotic cells for *DDX11* silencing (Figures 3C and S3B), supporting the notion that *Ddx11* knockout in mouse was found to be lethal (Inoue et al., 2007) and suggesting that a  $\sim$ 50% reduction in the levels of *CONCR* or *DDX11* (Figures 4C and 4D) were sufficient to cause substantial cohesion defects that ultimately result in cell death. To better appreciate the extent of the cohesion defects, we subclassified the “loss of cohesion” phenotype into either “loosely paired” or “completely separated” chromatids and compared the effect of *CONCR* and *DDX11* knockdowns with that obtained by silencing the cohesion complex component *RAD21* (Figures S3C–S3I). The same was done in HCT116 (Figures S3F and S3G) and HeLa cells (Figures S3H and S3I) to evaluate possible cell-type variability. Results showed that the “loosely paired” phenotype appeared predominant in respect to “completely separated”

and that both the aspect of the chromatids and the percentages of the phenotype classifications appeared comparable across cell lines (Figure S3). *RAD21* depletion showed a higher number of metaphases with cohesion defects compared to *CONCR* or *DDX11* knockdowns, although it may reflect the differences observed in terms of knockdown efficiencies (Figure S3). On the other hand, the knockdown of *WAPL*, a regulator of sister chromatid resolution (Gandhi et al., 2006), which is known to restore the cohesion defect caused by *DDX11* depletion (de Lange et al., 2015), was also able to restore cohesion defects in *CONCR*-deficient cells (Figures S3J–S3L), suggesting that *DDX11* and *CONCR* affect chromosomal cohesion at the same level.

To further confirm these results, we silenced *CONCR* in A549 cells by inserting a polyadenylation signal immediately downstream of *CONCR* promoter using the CRISPR-Cas9 system. We obtained several clones with *CONCR* expression reduced to different levels, probably corresponding to different levels of

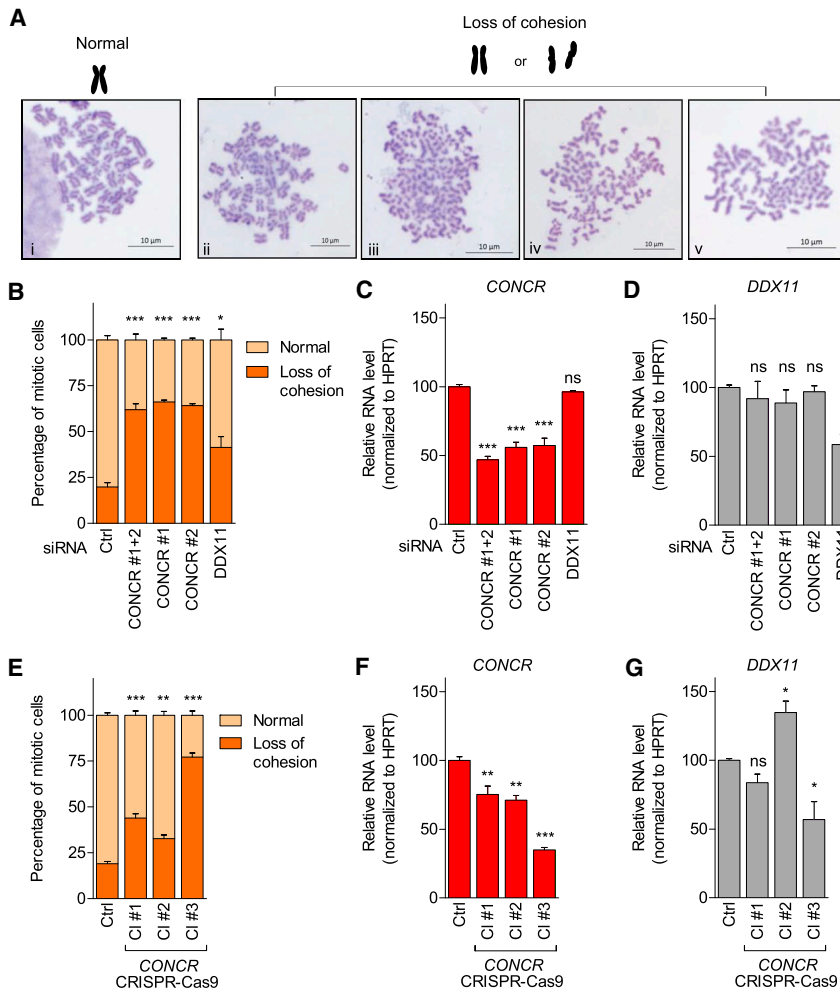

**Figure 4. Depletion of *CONCR* Causes Sister Chromatid Cohesion Defects**

(A) Representative images of chromosome spreads showing normal X-shaped conformation observed in control cells (i) or representative images of cohesion defects observed in cells depleted of *CONCR* or *DDX11* (ii–v).

(B) Percentage of mitotic cells showing normal sister chromatid cohesion or loss of cohesion. At least 50 metaphases per condition were scored and each experiment blindly scored twice. Graph shows mean  $\pm$  SD of three independent experiments.

(C and D) *CONCR* and *DDX11* knockdown efficiencies determined by qRT-PCR. Graphs show mean  $\pm$  SD of three independent experiments.

(E) Percentage of mitotic cells showing normal sister chromatid cohesion or loss of cohesion measured as in (B) in A549 control cells (Ctrl) and in different clones (Cl #1, Cl #2, and Cl #3) of A549 cells showing silencing of *CONCR* by insertion of a selection marker gene with a polyadenylation signal. Graph shows mean  $\pm$  SD of three (Cl #1 and #2) or two (Cl #3) independent experiments.

(F and G) *CONCR* and *DDX11* levels determined by qRT-PCR.

See also Figures S3 and S4.

heterozygosity of A549 polyploid cells (Figure S4). Notably, the two clones that presented lower expression of *CONCR*, marked as clones #3 and #4, did not survive cell culture passaging, allowing us to perform only two independent chromosome spread preparations, or none in the case of clone #3 and clone #4. Nevertheless, the results obtained using the *CONCR* CRISPR-Cas9-edited cells showed a consistent increase in the number of metaphases with cohesion defects (Figure 4E), supporting the results previously obtained by RNAi (Figure 4B). Moreover, both in the case of RNAi- and CRISPR-Cas9-mediated depletion of *CONCR*, the percentage of cells with cohesion loss clearly correlated with the level of knockdown achieved for *CONCR* (Figures 4B, 4C, 4E, and 4F). Remarkably, changes in the levels of *DDX11* did not appear to contribute to the phenotype observed (Figures 4B, 4D, 4E, and 4G).

Together, these results suggest that *CONCR* has a biological function in sister chromatid cohesion.

#### ***CONCR* Modulates the Activity of the Helicase *DDX11***

The common sister chromatid cohesion phenotype suggested a functional relationship between *CONCR* and *DDX11*, which are co-regulated divergent genes (Figure S2F and Figure 1A). To date, several lncRNAs have been shown to modulate the expres-

sion levels of neighboring protein-coding genes in a mechanism known as regulation in *cis* (Guil and Esteller, 2012; Villegas and Zaphiropoulos, 2015). However, as shown above, *CONCR* depletion caused cohesion defects without affecting *DDX11* RNA levels (Figure 4). Indeed, *DDX11* RNA levels remained unchanged when silencing the lncRNA and increased when silencing p53 (Figures S5A–S5C and S2A). In agreement with this observation, histone H3K9 acetylation at *DDX11* promoter region was not affected by knockdown of *CONCR* (Figure S5D). Similarly, western blot analysis did not show changes in *DDX11* protein levels upon *CONCR* knockdown (Figure S5E). We then concluded that *CONCR* does not regulate *DDX11* RNA or protein levels.

Having excluded a possible regulation in *cis* of *DDX11* by the lncRNA, we investigated the possibility of a physical interaction between them. To that end, we incubated cell extracts with biotinylated oligonucleotides with sequence complementarity to *CONCR*, and bound material was then pulled down using streptavidin beads. Analysis of a fraction of the pull-down eluates confirmed specific *CONCR* enrichment using two independent oligos compared to the lacZ control or other control RNAs (Figure 5A). Interestingly, the protein *DDX11* was found to associate with the pulled down *CONCR* (Figure 5B). In contrast, a control nuclear protein, WDR5 (subunit of the MLL1/MLL complex), was not detected bound to *CONCR* (Figure 5B). Moreover, the interaction between *CONCR* and *DDX11* was confirmed using RNA immunoprecipitation (RIP) from cross-linked nuclear extracts. A significant enrichment of *CONCR*, but not several control RNAs in *DDX11* immunoprecipitates, was observed,

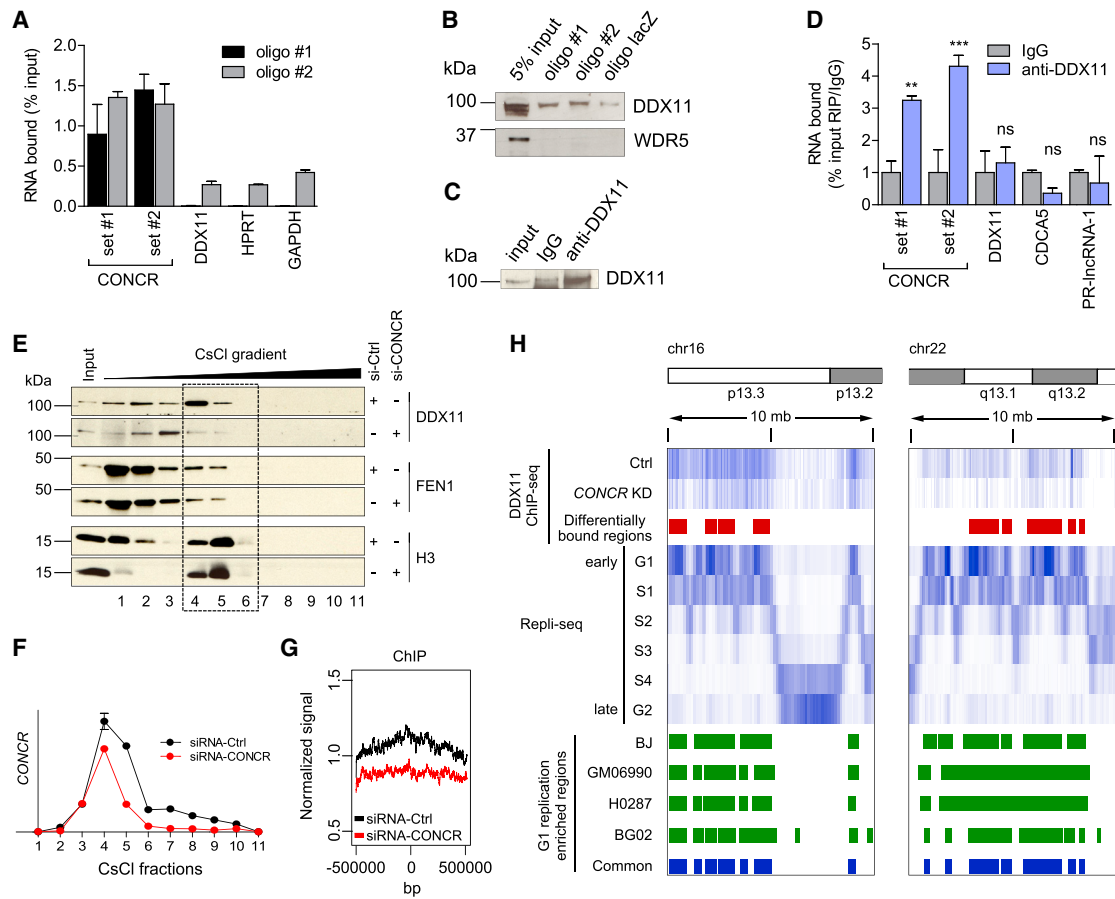

**Figure 5. CONCR Interacts with DDX11 Protein and Regulates Its Function**

(A) Percentage of *CONCR* and control RNAs (*DDX11*, *HPRT*, and *GAPDH*) pulled down with two independent biotinylated oligonucleotides (oligo #1 and oligo #2) in A549 cells.

(B) *DDX11* and *WDR5* (control) western blots of the *CONCR* associated proteins pulled down as in (A).

(C) Western blot of *DDX11* immunoprecipitation as in (D).

(D) Percentage of *CONCR* and control RNAs (*DDX11*, *CDCA5*, and *PR-IncRNA-1*) immunoprecipitated with an anti-*DDX11* antibody or IgG control. Graph shows mean  $\pm$  SD of three independent experiments. Significance was determined comparing to IgG.

(E) *DDX11*, *FEN1*, and histone 3 (*H3*) distribution in the fractions obtained from CsCl density-gradient centrifugation of A549 cells transfected with control or *CONCR* siRNAs as indicated.

(F) Quantification by qRT-PCR of *CONCR* in the gradient fractions shown in (E).

(G) Mean *DDX11* ChIP-seq signal around the center of all the genomic regions identified as differentially bound by *DDX11* in *CONCR*-depleted cells compared to siRNA-Ctrl-transfected cells.

(H) *DDX11* ChIP-seq. Top to bottom: chromosome schematic of two representative regions of chr16 and chr22; *DDX11* ChIP-seq signal in control (Ctrl) and *CONCR*-depleted cells (KD); regions with differential binding of *DDX11* (Ctrl versus KD); signals of DNA replicating regions of BJ cells in G1 to G2 phases of the cell cycle as reported in Hansen et al. (2010); G1-replication-enriched regions common to BJ, GM06990, H0287, and BG02 cell types as reported in Hansen et al. (2010).

See also Figures S5 and S6, and Table S5.

whereas no *CONCR* was detected when using the IgG control (Figures 5C and 5D).

*DDX11* is known to function at the replication fork, coordinating lagging strand synthesis and sister chromatid cohesion (Bharti et al., 2014). Therefore, we hypothesized that *CONCR* association with *DDX11* may affect its function in DNA replication. To test this, we performed chromatin fractionation by CsCl density-gradient centrifugation. This protocol allows separating the chromatin fractions that are enriched in DNA replication factors (Dellino et al., 2013), as the gradient can separate the proteins

that are bound to the chromatin from those in the soluble fraction of the nucleus, as well as from the protein-free DNA (Figures 5E, S5F, and S5G). We observed that in control conditions *DDX11* peaks at the chromatin fraction, co-localizing with *CONCR*, while knockdown of *CONCR* induces a shift in *DDX11* from the chromatin-bound to the soluble fractions (Figures 5E and 5F). Importantly, this shift seems specific, as *FEN1*, a protein known to function in coordination with *DDX11* (Farina et al., 2008), remains in the same fractions upon *CONCR* knockdown (Figure 5E). These data show that *CONCR* and *DDX11* co-localize on the



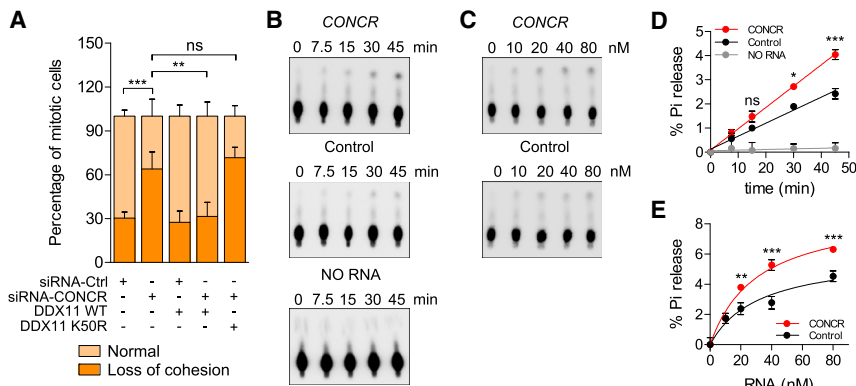

### Figure 6. *CONCR* Enhances the ATPase Activity of DDX11

(A) Percentage of mitotic cells showing normal sister chromatid cohesion or loss of cohesion transfected with the indicated combination of siRNAs and DDX11 expression plasmids. Graph shows mean  $\pm$  SD of two independent experiments, each blindly scored twice.

(B–E) Representative images (B and C) and quantification (D and E) of three independent ATPase assays (mean  $\pm$  SD) using recombinant purified human DDX11 and in vitro transcribed RNAs, *CONCR*, or a control RNA (antisense sequence of *CONCR*). The standard reaction mixture contained 80 nM (B and D) or the indicated concentration of RNA (C and E) and was incubated for the indicated time (B and D) or 45 min (C and E). See also Figure S5.

chromatin, and the association of DDX11 with the chromatin is highly dependent on *CONCR*. We further investigated this relationship between DDX11 and *CONCR* by performing DDX11 ChIP-seq in cells depleted of *CONCR* by RNAi or transfected with a siRNA-control and synchronized in G1/S (Figures S5H and S5I). The analysis of the ChIP-seq data revealed broad binding of DDX11 to the chromatin, covering genomic regions in the order of mega bases (Figures 5G, 5H, and S6). As expected, DDX11 ChIP-seq signal preferentially matched to early DNA replicating regions previously identified by Repli-seq analysis of four different cell types (Hansen et al., 2010) (Supplemental Experimental Procedures, Figure 5H, and Figure S6). Interestingly, silencing of *CONCR* caused a significant decrease in the association of DDX11 to 43 of these 867 replicating regions, while no significant differences were observed in the remaining regions (Figures 5G, 5H, and S6 and Table S5), supporting the notion that the function of DDX11 is dependent on *CONCR*.

To further investigate the functional relationship between *CONCR* and DDX11 protein, we overexpressed DDX11 in cells depleted or not of *CONCR*, and chromosome spreads were prepared and analyzed for cohesion defects. As observed before, the number of metaphases with sister chromatid cohesion loss significantly increased in cells depleted of *CONCR* (Figures 6A, S5J, and S5K). Furthermore, the cohesion defect was rescued by the overexpression of DDX11, confirming that both factors function in the same pathway (Figures 6A, S5J, and S5K). On the other hand, when instead of the wild-type form, the DDX11 ATPase defective mutant K50R (Farina et al., 2008) was overexpressed, no rescue of the cohesion defect was observed (Figures 6A, S5J, and S5K).

Since we observed a physical and functional interaction between the lncRNA and DDX11, but not the catalytic mutant, we hypothesized that *CONCR* could have an effect on the enzymatic activity of DDX11. To test this hypothesis, we assayed the ATPase activity of DDX11 either in the presence of *CONCR* or a control RNA of the same length. Both time course and RNA titration experiments showed a significant increase in the ability of DDX11 to hydrolyze ATP when incubated in the presence of the lncRNA, significantly higher than that observed when the enzyme was incubated with the control RNA (Figures 6B–6E). The result of these in vitro assays suggests a potential function

for *CONCR* as a modulator of DDX11 enzymatic activity, which is required for the proper function of the protein in DNA replication and sister chromatid cohesion.

Collectively, our results show that *CONCR* is an MYC-regulated lncRNA upregulated in cancer, which modulates DNA replication and sister chromatid cohesion by enhancing the catalytic activity of DDX11 and binding to DNA replicating regions.

## DISCUSSION

Long noncoding RNAs represent more than half of the total of human transcripts. Although it still remains to be shown how many of these lncRNAs are functional, it is suspected that they intervene in most cellular processes. Here we report, for the first time to our knowledge, an lncRNA involved in sister chromatid cohesion.

The establishment of sister chromatid cohesion is tightly linked to DNA replication. The role of *CONCR* at this specific stage of cell division is consistent with its regulated expression by MYC and also in agreement with its repression by p53 and up-regulation in highly proliferative cells, such as cancer cells. *CONCR*, similar to other previously described lncRNAs, is a transcriptional target of MYC (Hart et al., 2014; Kim et al., 2015). This highlights how the oncogenic MYC orchestrates a cell-cycle-regulated transcriptional response that includes lncRNAs to promote cell proliferation by diverse mechanisms (Hart et al., 2014; Kim et al., 2015), and opens up the possibility to novel cancer treatments that involve targeting lncRNAs such as *CONCR*.

*CONCR* is transcribed divergently from DDX11 promoter region, sharing with the protein-coding gene a common pattern of expression and regulation. Although *CONCR* does not affect the levels of DDX11 mRNA or protein, we show that both genes are coordinately regulated to participate in the same biological process. This may represent a common feature shared with other lncRNA-protein-coding gene pairs that are transcribed from bidirectional promoters in the genome.

DDX11 is a DNA helicase that links the replication of the lagging DNA strand with the establishment of chromosomal cohesion (Bharti et al., 2014), and it is especially required in order to solve stalled replication forks (Cali et al., 2016). Although we cannot exclude that *CONCR* has additional activities, our results

show that *CONCR* mainly functions at this level. We show that the interaction between DDX11 and *CONCR* is required for the proper function of DDX11 *in vivo*, reflected by its efficient binding to DNA at replicating regions. Interestingly, *in vitro* assays show that *CONCR* enhances the ATPase activity of DDX11, acting as an RNA effector for the enzyme. As observed for RNA helicases, RNA seems to stimulate ATPase activity of DDX11; however, the degree of stimulation varies depending on the RNA species and is greater in the presence of *CONCR*. It remains to be elucidated whether *CONCR* has a direct effect on DDX11 catalytic activity *in vivo*, or whether it regulates its function by other means. Like *CONCR*, two other lncRNAs have been recently shown to act by modulating the activity of RNA and DNA helicases (Han et al., 2014; Huang et al., 2015). We speculate that the mode of action of *CONCR* may represent a more widely spread mechanism in which lncRNAs interact with DNA/RNA helicases to modulate their activity.

In summary, we have uncovered a so far unknown function for an lncRNA in a critical step of cell division, which impacts genome instability, a major hallmark of cancer cells.

## EXPERIMENTAL PROCEDURES

### Cell Culture, RNAi, and Transfection

A549 and HCT116 (gift from Dr. Vogelstein) cells were cultured in RPMI 1640 medium (GIBCO) supplemented with 10% fetal calf serum (GIBCO). HeLa cells were cultured in DMEM medium (GIBCO) supplemented with 10% fetal calf serum (GIBCO). Cells were maintained at 37°C in the presence of 5% CO<sub>2</sub>. For DNA damage, cells were treated with 350 μM 5-fluorouracil (F6627; Sigma) or 500 nM doxorubicin hydrochloride (Sigma D1515). For RNAi, cells were transfected twice, 24 hr apart, using 40 nM siRNA (final concentration) and Lipofectamine 2000 (Invitrogen). All siRNAs used in this study were obtained from Sigma and are listed in Table S6. pcDNA3-His<sub>6</sub>-DDX11-3xFLAG wild-type and K50R constructs were previously described (Wu et al., 2012) and transfected using Lipofectamine 2000.

### RNA Extraction and qRT-PCR

Total RNA was isolated using TRIzol (Sigma). cDNA was generated following DNase I (Invitrogen) treatment using the High-Capacity cDNA Reverse Transcription Kit (Applied Biosystem) with random primers. This cDNA was analyzed by qPCR using SYBR Green reagent (Applied Biosystem). Relative quantitation with standard curves was used for RNA quantitation using *HPRT* as normalizer. All primers used in the study are listed in Table S6.

### Nuclear-Cytoplasmic Fractionation

A total of 10<sup>7</sup> cells were collected by trypsinization and divided into two tubes. One cell pellet represented the whole-cell extract, while the other one was processed for the remaining subcellular fractions. Both pellets were resuspended in 500 μL of buffer A (10 mM Tris-HCl [pH 7.5], 1.5 mM MgCl<sub>2</sub>, 140 mM NaCl, 0.05% Igepal supplemented with 1× cComplete Protease Inhibitor Cocktail [Roche] and SUPERaseIN [Ambion] 10 U/mL), incubated for 10 min on ice and kept for subsequent RNA extraction. A total of 500 μL of buffer A containing 50% sucrose was settled at the bottom of a clean tube and the whole-cell extract in buffer A was gently added on top, preventing mixture of the two phases and centrifuged at 12,000 × g for 10 min at 4°C to obtain nuclear and cytoplasmic fractions. RNA was then extracted from fractions using TRIzol.

### RNA FISH

Cells were washed in 1× PBS and fixed with freshly prepared 3.7% formaldehyde for 15 min. For RNA-FISH, fluorescein-labeled Locked Nucleic Acid (LNA) DNA probes were synthesized by Exiqon and hybridized according to manufacturer's protocol with some modifications. LNA sequences are listed in Table S6. Fixed cells were first incubated with 70% ethanol for 1 hr and then with

acetylation buffer (0.1 M triethanol amine, 0.5% [v/v] acetic anhydride) for 30 min. To avoid unspecific probe binding, warm hybridization buffer (10% dextran sulfate, 50% formamide, 2× SSC) was added and cells incubated for 1 hr at 55°C. Meanwhile, LNA probes were denatured at 92°C for 4 min and then mixed with hybridization buffer to a final concentration of 25 nM. The specific probe-target RNA hybridization was performed overnight at 55°C. The following day, the probes' residues were eliminated through extensive washes with 2× SSC buffer and fixed cells were incubated with 3% hydrogen peroxide for 30 min. For fluorescein (FAM) detection, cells were first incubated with blocking buffer (10% heat-inactivated goat serum, 0.5% Blocking Reagent [Roche, 11096176001] in PBS-0.5% Tween-20) and then with 1.5 U/ml of specific anti-FAM-POD antibody (Roche, 11426346910) diluted in blocking buffer. After washing three times with 2× SSC solution, the signal was developed through incubation with TSA-Cy3 solution (Perkin Elmer). Antibody residues were eliminated through extensive washing with 4× SSC solution and the slides were prepared for microscope imaging using mounting solution with DAPI.

### Mouse Xenograft

Ten million HCT116 cells transfected with *CONCR*-targeting siRNAs or with a control siRNA were collected and subcutaneously injected in the flanks of 6- to 7-week-old female BALB/c-Rag2<sup>-/-</sup>/IL2c/immunodeficient mice (n = 6 per experimental condition). Tumor size was measured using a precision caliper and tumor volume calculated using the following equation:  $V = \pi/6 \times \text{width} \times \text{height} \times \text{length}$ . Tumor growth was measured every 3 days for 1 month.

### Tumor Analysis

Gene expression was determined in colon adenocarcinoma and lung adenocarcinoma RNA-seq data available through the TCGA database (<https://gdc-portal.nci.nih.gov>). The aligned reads were assigned and quantified using cufflinks v2.2.1 (Trapnell et al., 2012). *CONCR* expression was compared in each cancer type between: (1) normal tissue samples and primary tumor samples, and (2) from those tumor samples, individuals bearing mutations in *TP53* and those with the wild-type gene. Statistical significance was determined by unpaired Student's t test. See also Table S2 and Table S4.

### Cell Proliferation, Apoptosis, and Cell-Cycle Analyses

Cell proliferation was measured using the CellTiter96 Aqueous Non-Radioactive Cell Proliferation Assay (MTS) kit (Promega) following the manufacturer's instructions. Apoptosis was measured by Annexin V and 7-AAD staining using the Apoptosis Detection Kit I (BD Biosciences) and a fluorescence-activated cell sorting (FACS) flow cytometer (FACSCalibur, BD Biosciences). For cell-cycle analysis, cells were labeled with propidium iodide and sorted in the FACS-Calibur flow cytometer (BD Biosciences). Data were acquired and analyzed by BD CellQuest and Flow Jo software. G1/S synchronized cells were obtained by double thymidine block procedure; cells were cultured for 16 hr in the presence of 2 mM thymidine, for 9 hr in normal medium, and then again for 16 hr in the presence of 2 mM thymidine. Normal medium was then used for the release and cells were collected at different time points for cell-cycle analysis.

### Chromosome Spreads

Chromosome spreads were performed as follows: cells were grown at 37°C in the presence of 30 μg/ml KaryoMax Colcemid Solution (GIBCO) for 12 hr to enrich mitotic cells. Cells were then harvested by trypsinization and incubated in a hypotonic solution of KCl 0.075M for 30 min at 37°C. Cells were subsequently fixed with freshly made Carnoy's buffer (1:3 acetic acid:methanol) for 10 min at room temperature (RT) and pelleted. This fixation step was repeated two times. The suspension of cells was dropped onto a clean slide and stained with Giemsa. Chromosome spreads from individual cells were imaged and scored with regards to the status of sister chromatid. At least 50 metaphases per slide were scored and each experiment was blindly scored twice.

### CRISPR-Cas9 Editing

The *Streptococcus pyogenes* Cas9 (SpCas9) target site in *CONCR* exon 1 to design the single guide RNA (sgRNA) was found using the CRISPR Design Tool from the Zhang Lab (<http://crispr.mit.edu/>). Oligonucleotides to clone

the guide RNA (Table S6) were then annealed and cloned into the CAS9-containing plasmid pX330 (Cong et al., 2013). The repair template used to insert the Neomycin (Neo)-SV40pA sequence at the site of cleavage was cloned as follows (see also Figure S4 for a schematic). The Neo-SV40pA sequence was amplified by PCR from a pcDNA3 backbone using the primers listed in Table S6. Right and left flanking regions to the cleavage site were amplified by PCR from genomic DNA (A549 cells) using the primers listed in Table S6. The three parts, i.e., right, Neo-SV40pA, and left, were then joined and cloned into pcDNA3 in the following order (KpnI-right-BamHI-Neo-SV40pA-NotI-left-XhoI). The repair template was therefore obtained by KpnI-XhoI digestion of the construct and gel extraction. All constructs were verified by sequencing. pX330-sgRNA and repair template were then co-transfected into A549 cells using Lipofectamine 2000. Cells were grown for 48 hr and then G418 (GIBCO) was added to the culture medium to select for cells with recombined Neomycin sequence. Single cell derived-clones were isolated and expanded. Genomic DNA and total RNA were therefore extracted and used for screening analysis by PCR, sequencing, and qRT-PCR (Figure S4).

#### RNA Pull-down

RNA pull-down was performed as previously described (Marín-Béjar and Huarte, 2015), except that cell extracts were incubated with biotinylated oligonucleotides with sequence complementarity to *CONCR* and then with streptavidin magnetic beads. Oligonucleotide sequences are listed in Table S6.

#### Microarray Hybridization and Data Analysis

Total RNA was isolated using TRIzol. As a last step of the extraction procedure, the RNA was purified with the RNeasy Mini-kit (QIAGEN). Before cDNA synthesis, RNA integrity from each sample was confirmed on Agilent RNA Nano Lab-Chips (Agilent Technologies). The sense cDNA was prepared from 300 ng of total RNA using the AmbionWT Expression Kit. The sense strand cDNA was then fragmented and biotinylated with the Affymetrix GeneChip WT Terminal Labeling Kit (PN900671). Labeled sense cDNA was hybridized to the Affymetrix Human Transcriptome Array 2.0 according to the manufacturer protocols and using GeneChip Hybridization, Wash, and Stain Kit. GeneChips were scanned with the Affymetrix GeneChip Scanner 3000. Both background correction and normalization were done using RMA (Robust Multichip Average) algorithm (Irizarry et al., 2003) using Affymetrix Power Tools. After quality assessment, a filtering process was performed to eliminate low expression probe sets. R and Bioconductor were used for preprocessing and statistical analysis. LIMMA (Smyth, 2004) was used to find the probe sets that showed significant differential expression between experimental conditions. Functional and pathway analyses were performed using GREAT (McLean et al., 2010). See also Table S3.

#### ACCESSION NUMBERS

The accession number for the RNA-seq, ChIP-seq, and microarray data reported in this paper is GEO: GSE81602.

#### SUPPLEMENTAL INFORMATION

Supplemental Information includes Supplemental Experimental Procedures, six figures, and six tables and can be found with this article online at <http://dx.doi.org/10.1016/j.molcel.2016.06.031>.

#### AUTHOR CONTRIBUTIONS

Conceptualization, F.P.M. and M.H.; Investigation, F.P.M., E.G., O.M.-B., S.K.B., I.R., and J.G.; Formal Analysis, D.J.M.-H., A. Athie, and A. Amadoz; Writing, F.P.M. and M.H.; Resources, R.M.B.; Funding Acquisition, R.M.B. and M.H.; Supervision, M.H.

#### ACKNOWLEDGMENTS

We are most grateful to Dr. Victor Segura and Carmen Ferreira-Espinar for technical assistance. We thank the ENCODE project and The Cancer Genome

Atlas database for their valuable datasets. Our research was supported by the European Research Council Starting Grant 281877 and the Spanish Ministry of Science Grants BFU2014-58027-R and SRYC11001008347XV0. This work was supported in part by the Intramural Research Program of the NIH, National Institute on Aging.

Received: March 15, 2016

Revised: May 18, 2016

Accepted: June 21, 2016

Published: July 28, 2016

#### REFERENCES

- Bharti, S.K., Khan, I., Banerjee, T., Sommers, J.A., Wu, Y., and Brosh, R.M., Jr. (2014). Molecular functions and cellular roles of the ChIR1 (DDX11) helicase defective in the rare cohesinopathy Warsaw breakage syndrome. *Cell. Mol. Life Sci.* **71**, 2625–2639.
- Biswas, A.K., and Johnson, D.G. (2012). Transcriptional and nontranscriptional functions of E2F1 in response to DNA damage. *Cancer Res.* **72**, 13–17.
- Bonasio, R., and Shiekhattar, R. (2014). Regulation of transcription by long noncoding RNAs. *Annu. Rev. Genet.* **48**, 433–455.
- Calì, F., Bharti, S.K., Di Perna, R., Brosh, R.M., Jr., and Pisani, F.M. (2016). Tim/Timeless, a member of the replication fork protection complex, operates with the Warsaw breakage syndrome DNA helicase DDX11 in the same fork recovery pathway. *Nucleic Acids Res.* **44**, 705–717.
- Cancer Genome Atlas Research Network (2014). Comprehensive molecular profiling of lung adenocarcinoma. *Nature* **511**, 543–550.
- Capo-Chichi, J.M., Bharti, S.K., Sommers, J.A., Yammine, T., Chouery, E., Patry, L., Rouleau, G.A., Samuels, M.E., Hamdan, F.F., Michaud, J.L., et al. (2013). Identification and biochemical characterization of a novel mutation in DDX11 causing Warsaw breakage syndrome. *Hum. Mutat.* **34**, 103–107.
- Cong, L., Ran, F.A., Cox, D., Lin, S., Barretto, R., Habib, N., Hsu, P.D., Wu, X., Jiang, W., Marraffini, L.A., and Zhang, F. (2013). Multiplex genome engineering using CRISPR/Cas systems. *Science* **339**, 819–823.
- de Lange, J., Faramarz, A., Oostra, A.B., de Menezes, R.X., van der Meulen, I.H., Rooimans, M.A., Rockx, D.A., Brakenhoff, R.H., van Beusechem, V.W., King, R.W., et al. (2015). Defective sister chromatid cohesion is synthetically lethal with impaired APC/C function. *Nat. Commun.* **6**, 8399.
- Dellino, G.I., Cittaro, D., Piccioni, R., Luzi, L., Banfi, S., Segalla, S., Cesaroni, M., Mendoza-Maldonado, R., Giacca, M., and Pelicci, P.G. (2013). Genome-wide mapping of human DNA-replication origins: levels of transcription at ORC1 sites regulate origin selection and replication timing. *Genome Res.* **23**, 1–11.
- Farina, A., Shin, J.H., Kim, D.H., Bermudez, V.P., Kelman, Z., Seo, Y.S., and Hurwitz, J. (2008). Studies with the human cohesin establishment factor, ChIR1. Association of ChIR1 with Ctf18-RFC and Fen1. *J. Biol. Chem.* **283**, 20925–20936.
- Fatica, A., and Bozzoni, I. (2014). Long non-coding RNAs: new players in cell differentiation and development. *Nat. Rev. Genet.* **15**, 7–21.
- Fischer, M., Steiner, L., and Engeland, K. (2014). The transcription factor p53: not a repressor, solely an activator. *Cell Cycle* **13**, 3037–3058.
- Gaillard, H., Garcia-Muse, T., and Aguilera, A. (2015). Replication stress and cancer. *Nat. Rev. Cancer* **15**, 276–289.
- Gandhi, R., Gillespie, P.J., and Hirano, T. (2006). Human Wapl is a cohesin-binding protein that promotes sister-chromatid resolution in mitotic prophase. *Curr. Biol.* **16**, 2406–2417.
- Guil, S., and Esteller, M. (2012). Cis-acting noncoding RNAs: friends and foes. *Nat. Struct. Mol. Biol.* **19**, 1068–1075.
- Han, P., Li, W., Lin, C.H., Yang, J., Shang, C., Numborg, S.T., Jin, K.K., Xu, W., Lin, C.Y., Lin, C.J., et al. (2014). A long noncoding RNA protects the heart from pathological hypertrophy. *Nature* **514**, 102–106.
- Hansen, R.S., Thomas, S., Sandstrom, R., Canfield, T.K., Thurman, R.E., Weaver, M., Dorschner, M.O., Gartler, S.M., and Stamatoyannopoulos, J.A.

- (2010). Sequencing newly replicated DNA reveals widespread plasticity in human replication timing. *Proc. Natl. Acad. Sci. USA* *107*, 139–144.
- Harrow, J., Frankish, A., Gonzalez, J.M., Tapanari, E., Diekhans, M., Kokocinski, F., Aken, B.L., Barrell, D., Zadissa, A., Searle, S., et al. (2012). GENCODE: the reference human genome annotation for The ENCODE Project. *Genome Res.* *22*, 1760–1774.
- Hart, J.R., Roberts, T.C., Weinberg, M.S., Morris, K.V., and Vogt, P.K. (2014). MYC regulates the non-coding transcriptome. *Oncotarget* *5*, 12543–12554.
- Ho, J.S., Ma, W., Mao, D.Y., and Benchimol, S. (2005). p53-Dependent transcriptional repression of c-myc is required for G1 cell cycle arrest. *Mol. Cell Biol.* *25*, 7423–7431.
- Huang, W., Thomas, B., Flynn, R.A., Gavzy, S.J., Wu, L., Kim, S.V., Hall, J.A., Miraldi, E.R., Ng, C.P., Rigo, F., et al. (2015). DDX5 and its associated lncRNA Rmrp modulate TH17 cell effector functions. *Nature* *528*, 517–522.
- Huarte, M. (2015). The emerging role of lncRNAs in cancer. *Nat. Med.* *21*, 1253–1261.
- Inoue, A., Li, T., Roby, S.K., Valentine, M.B., Inoue, M., Boyd, K., Kidd, V.J., and Lahti, J.M. (2007). Loss of ChlR1 helicase in mouse causes lethality due to the accumulation of aneuploid cells generated by cohesion defects and placental malformation. *Cell Cycle* *6*, 1646–1654.
- Irizarry, R.A., Hobbs, B., Collin, F., Beazer-Barclay, Y.D., Antonellis, K.J., Scherf, U., and Speed, T.P. (2003). Exploration, normalization, and summaries of high density oligonucleotide array probe level data. *Biostatistics* *4*, 249–264.
- Iyer, M.K., Niknafs, Y.S., Malik, R., Singhal, U., Sahu, A., Hosono, Y., Barrette, T.R., Prensner, J.R., Evans, J.R., Zhao, S., et al. (2015). The landscape of long noncoding RNAs in the human transcriptome. *Nat. Genet.* *47*, 199–208.
- Kaesler, M.D., Pebernard, S., and Iggo, R.D. (2004). Regulation of p53 stability and function in HCT116 colon cancer cells. *J. Biol. Chem.* *279*, 7598–7605.
- Kim, T., Jeon, Y.J., Cui, R., Lee, J.H., Peng, Y., Kim, S.H., Tili, E., Alder, H., and Croce, C.M. (2015). Role of MYC-regulated long noncoding RNAs in cell cycle regulation and tumorigenesis. *J. Natl. Cancer Inst.* *107*, 107.
- Losada, A. (2014). Cohesin in cancer: chromosome segregation and beyond. *Nat. Rev. Cancer* *14*, 389–393.
- Marín-Béjar, O., and Huarte, M. (2015). RNA pulldown protocol for in vitro detection and identification of RNA-associated proteins. *Methods Mol. Biol.* *1206*, 87–95.
- Masai, H., Matsumoto, S., You, Z., Yoshizawa-Sugata, N., and Oda, M. (2010). Eukaryotic chromosome DNA replication: where, when, and how? *Annu. Rev. Biochem.* *79*, 89–130.
- McLean, C.Y., Bristor, D., Hiller, M., Clarke, S.L., Schaaf, B.T., Lowe, C.B., Wenger, A.M., and Bejerano, G. (2010). GREAT improves functional interpretation of cis-regulatory regions. *Nat. Biotechnol.* *28*, 495–501.
- Parish, J.L., Rosa, J., Wang, X., Lahti, J.M., Doxsey, S.J., and Androphy, E.J. (2006). The DNA helicase ChlR1 is required for sister chromatid cohesion in mammalian cells. *J. Cell Sci.* *119*, 4857–4865.
- Peters, J.M., and Nishiyama, T. (2012). Sister chromatid cohesion. *Cold Spring Harb. Perspect. Biol.* *4*, 4.
- Rinn, J.L., and Chang, H.Y. (2012). Genome regulation by long noncoding RNAs. *Annu. Rev. Biochem.* *81*, 145–166.
- Rinn, J.L., and Huarte, M. (2011). To repress or not to repress: this is the guardian's question. *Trends Cell Biol.* *21*, 344–353.
- Sabò, A., and Amati, B. (2014). Genome recognition by MYC. *Cold Spring Harb. Perspect. Med.* *4*, 4.
- Sachdeva, M., Zhu, S., Wu, F., Wu, H., Walia, V., Kumar, S., Elble, R., Watabe, K., and Mo, Y.Y. (2009). p53 represses c-Myc through induction of the tumor suppressor miR-145. *Proc. Natl. Acad. Sci. USA* *106*, 3207–3212.
- Sánchez, Y., Segura, V., Marín-Béjar, O., Athie, A., Marchese, F.P., González, J., Bujanda, L., Guo, S., Matheu, A., and Huarte, M. (2014). Genome-wide analysis of the human p53 transcriptional network unveils a lncRNA tumour suppressor signature. *Nat. Commun.* *5*, 5812.
- Skibbens, R.V., Colquhoun, J.M., Green, M.J., Molnar, C.A., Sin, D.N., Sullivan, B.J., and Tanzosh, E.E. (2013). Cohesinopathies of a feather flock together. *PLoS Genet.* *9*, e1004036.
- Smyth, G.K. (2004). Linear models and empirical bayes methods for assessing differential expression in microarray experiments. *Stat. Appl. Genet. Mol. Biol.*, Published online February 12, 2004. <http://dx.doi.org/10.2202/1544-6115.1027>.
- Trapnell, C., Roberts, A., Goff, L., Pertea, G., Kim, D., Kelley, D.R., Pimentel, H., Salzberg, S.L., Rinn, J.L., and Pachter, L. (2012). Differential gene and transcript expression analysis of RNA-seq experiments with TopHat and Cufflinks. *Nat. Protoc.* *7*, 562–578.
- van der Lelij, P., Chrzanowska, K.H., Godthelp, B.C., Rooimans, M.A., Oostra, A.B., Stumm, M., Zdzienicka, M.Z., Joenje, H., and de Winter, J.P. (2010). Warsaw breakage syndrome, a cohesinopathy associated with mutations in the XPD helicase family member DDX11/ChlR1. *Am. J. Hum. Genet.* *86*, 262–266.
- Villegas, V.E., and Zaphiropoulos, P.G. (2015). Neighboring gene regulation by antisense long non-coding RNAs. *Int. J. Mol. Sci.* *16*, 3251–3266.
- Wu, Y., Sommers, J.A., Khan, I., de Winter, J.P., and Brosh, R.M., Jr. (2012). Biochemical characterization of Warsaw breakage syndrome helicase. *J. Biol. Chem.* *287*, 1007–1021.

**Molecular Cell, Volume 63**

**Supplemental Information**

**A Long Noncoding RNA Regulates**

**Sister Chromatid Cohesion**

**Francesco P. Marchese, Elena Grossi, Oskar Marín-Béjar, Sanjay Kumar Bharti, Ivan Raimondi, Jovanna González, Dannys Jorge Martínez-Herrera, Alejandro Athie, Alicia Amadoz, Robert M. Brosh, Jr., and Maite Huarte**



## **SUPPLEMENTAL INFORMATION**

### **A long noncoding RNA regulates sister chromatid cohesion**

Francesco P. Marchese<sup>1,2</sup>, Elena Grossi<sup>1,2</sup>, Oskar Marín-Béjar<sup>1,2</sup>, Sanjay Kumar Bharti<sup>3</sup>, Ivan Raimondi<sup>1,2</sup>, Jovanna González<sup>1,2</sup>, Dannys Jorge Martínez-Herrera<sup>1,2</sup>, Alejandro Athie<sup>1,2</sup>, Alicia Amadoz<sup>1,2,4</sup>, Robert M. Brosh Jr<sup>3</sup> and Maite Huarte<sup>1,2,\*</sup>

<sup>1</sup>Center for Applied Medical Research (CIMA), Department of Gene Therapy and Regulation of Gene Expression, University of Navarra, 55 Pio XII Ave., 31008, Pamplona, Spain.

<sup>2</sup>Institute of Health Research of Navarra (IdISNA), Pamplona, Spain.

<sup>3</sup>Laboratory of Molecular Gerontology, National Institute on Aging, National Institutes of Health, NIH Biomedical Research Center, 251 Bayview Blvd, Baltimore, MD 21224 USA.

<sup>4</sup>Current address: Computational Genomics Department, Centro de Investigación Príncipe Felipe (CIPF), Valencia, 46012, Spain.

\*Corresponding author: maitehuarte@unav.es

## **SUPPLEMENTAL FIGURES**

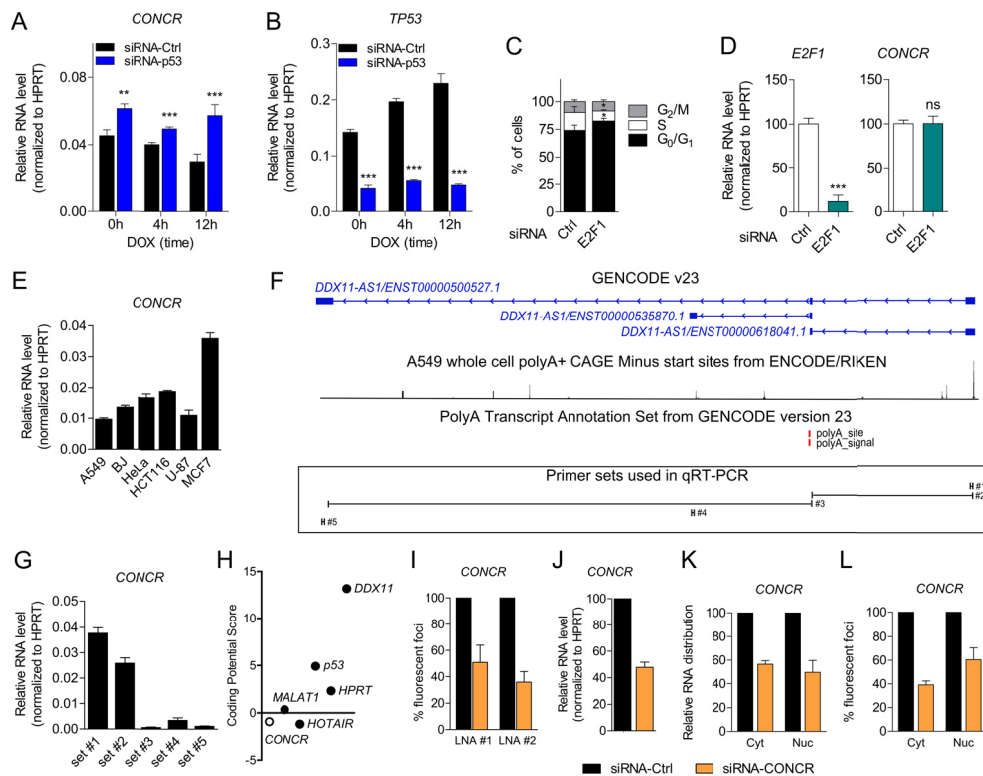

**Figure S1**, related to Figure 1

(A-B) *CONCR* and *TP53* expression levels determined by qRT-PCR of A549 cells transfected with a control siRNA (siRNA-Ctrl) or with a siRNA targeting *TP53* (siRNA-p53), either untreated or treated with the DNA damaging drug doxorubicin (DOX) for 4 and 12 hours. Graph shows mean  $\pm$  SEM of three independent experiments.

(C-D) Analysis of cell cycle phase distribution by flow cytometry of propidium iodide stained A549 cells either transfected with a control siRNA (Ctrl) or with a siRNA targeting *E2F1*. (D) *E2F1* and *CONCR* RNA levels determined by qRT-PCR. Graph shows mean  $\pm$  SEM of three independent experiments.

(E) *CONCR* relative expression level in different cell lines (A549, BJ, HeLa, HCT116, U-87 and MCF7) determined by qRT-PCR. Graph shows mean  $\pm$  SD of two independent experiments.

(F) *CONCR* (*DDX11-AS1*) isoforms as annotated in GENCODE version 23; position of the 5' and 3' ends by 5' cap gene expression analysis (CAGE) and polyA site and signal; positions along *CONCR* sequence of the different primer sets (#1 to #5) used in the qRT-PCRs shown in (G).

(G) *CONCR* relative expression level in A549 determined by qRT-PCR using different primer sets (#1 to #5). Graph shows mean  $\pm$  SD of three independent experiments.

(H) *CONCR* coding potential evaluated using the coding potential calculator generated by (Kong et al., 2007).

(I) Percentage of fluorescent foci detected by RNA-FISH in A549 transfected with a control siRNA (siRNA-Ctrl) or with a combination of two siRNAs targeting *CONCR* (siRNA-CONCR) using two independent LNA probes (LNA #1 and #2). Fluorescent foci were quantified imaging and counting approximately one hundred cells per condition. Graph shows mean  $\pm$  SD of two independent experiments.

(J) *CONCR* knockdown efficiency was determined by qRT-PCR. A fraction of cells analysed in (I) was used. Graph shows mean  $\pm$  SD of two independent experiments.

(K-L) Percentages of *CONCR* knockdown efficiencies in the cytoplasm (Cyt) and nucleus (Nuc) of A549 cells, analysed by subcellular fractionation (K) or RNA-FISH (L).

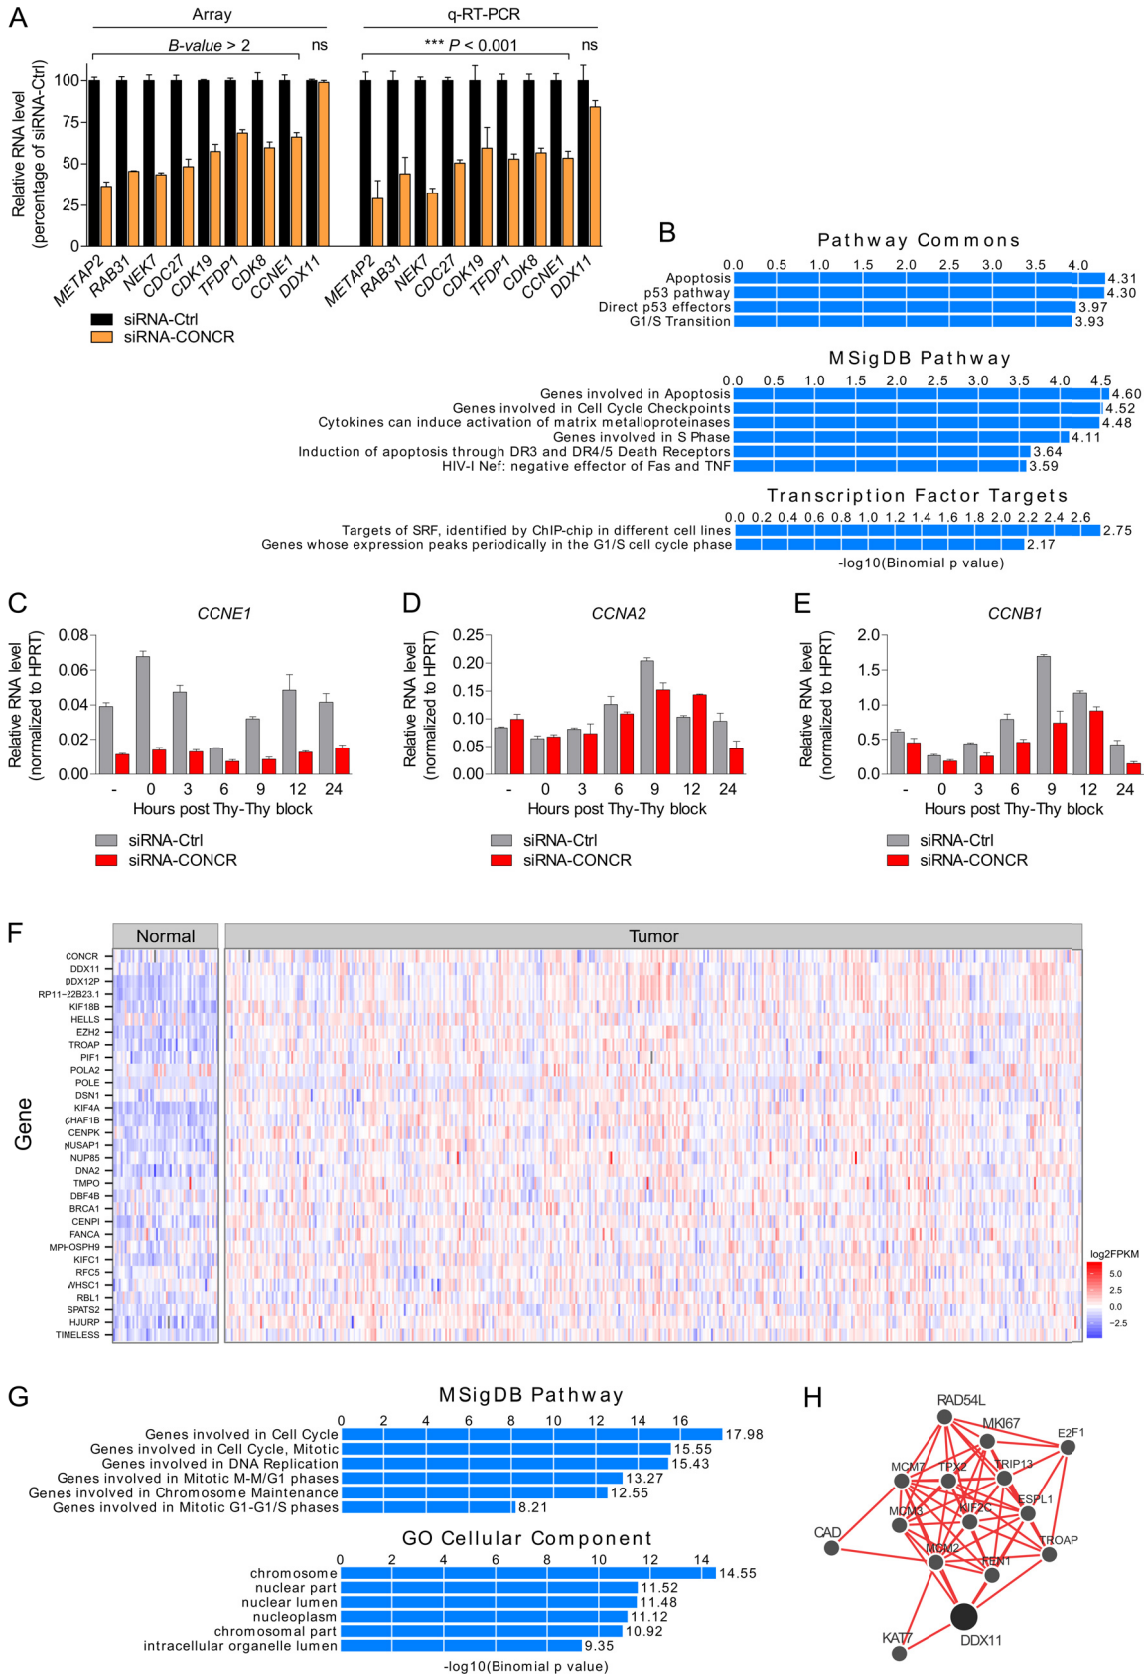

**Figure S2**, related to Figure 3

(A) Gene expression analysis of A549 cells depleted of CONCR. A549 were transfected with a control siRNA (siRNA-Ctrl) or with a combination of two siRNAs targeting CONCR (siRNA-

CONCR) and RNA levels analysed by microarray (left) or qRT-PCR (right). Graph shows mean  $\pm$  SEM of three independent experiments. Significance was determined by LIMMA for the array and by two-tailed unpaired t test for the qRT-PCR.

(B) GREAT functional and pathway analyses of the genes differentially expressed.

(C-E) A549 cells were either transfected with a control siRNA (Ctrl) or with two siRNAs targeting CONCR in combination. G1/S synchronized cells were obtained by double thymidine block procedure. Normal medium was then used for the release and cells collected at the different time points indicated for CCNE1, CCNA2 and CCNB1 expression analysis by qRT-PCR. Graphs show mean  $\pm$  SD of two independent experiments.

(F) Correlation analysis of CONCR expression level in both normal and lung adenocarcinoma samples of the TCGA-LUAD (lung adenocarcinoma) dataset (Cancer Genome Atlas Research, 2014). Top CONCR co-expressed genes are plotted. Graph shows expression values, as  $\log_2$ FPKM, in a colour scheme for both normal (n = 54) and lung adenocarcinoma (n = 441) samples obtained from the TCGA project database.

(G) GREAT functional and pathway analyses of genes co-expressed (correlation value > 0.45) with CONCR in the LUAD dataset.

(H) Multi-tissue functional interaction network of DDX11 obtained from GIANT ([giant.princeton.edu](http://giant.princeton.edu)) (Greene et al., 2015).

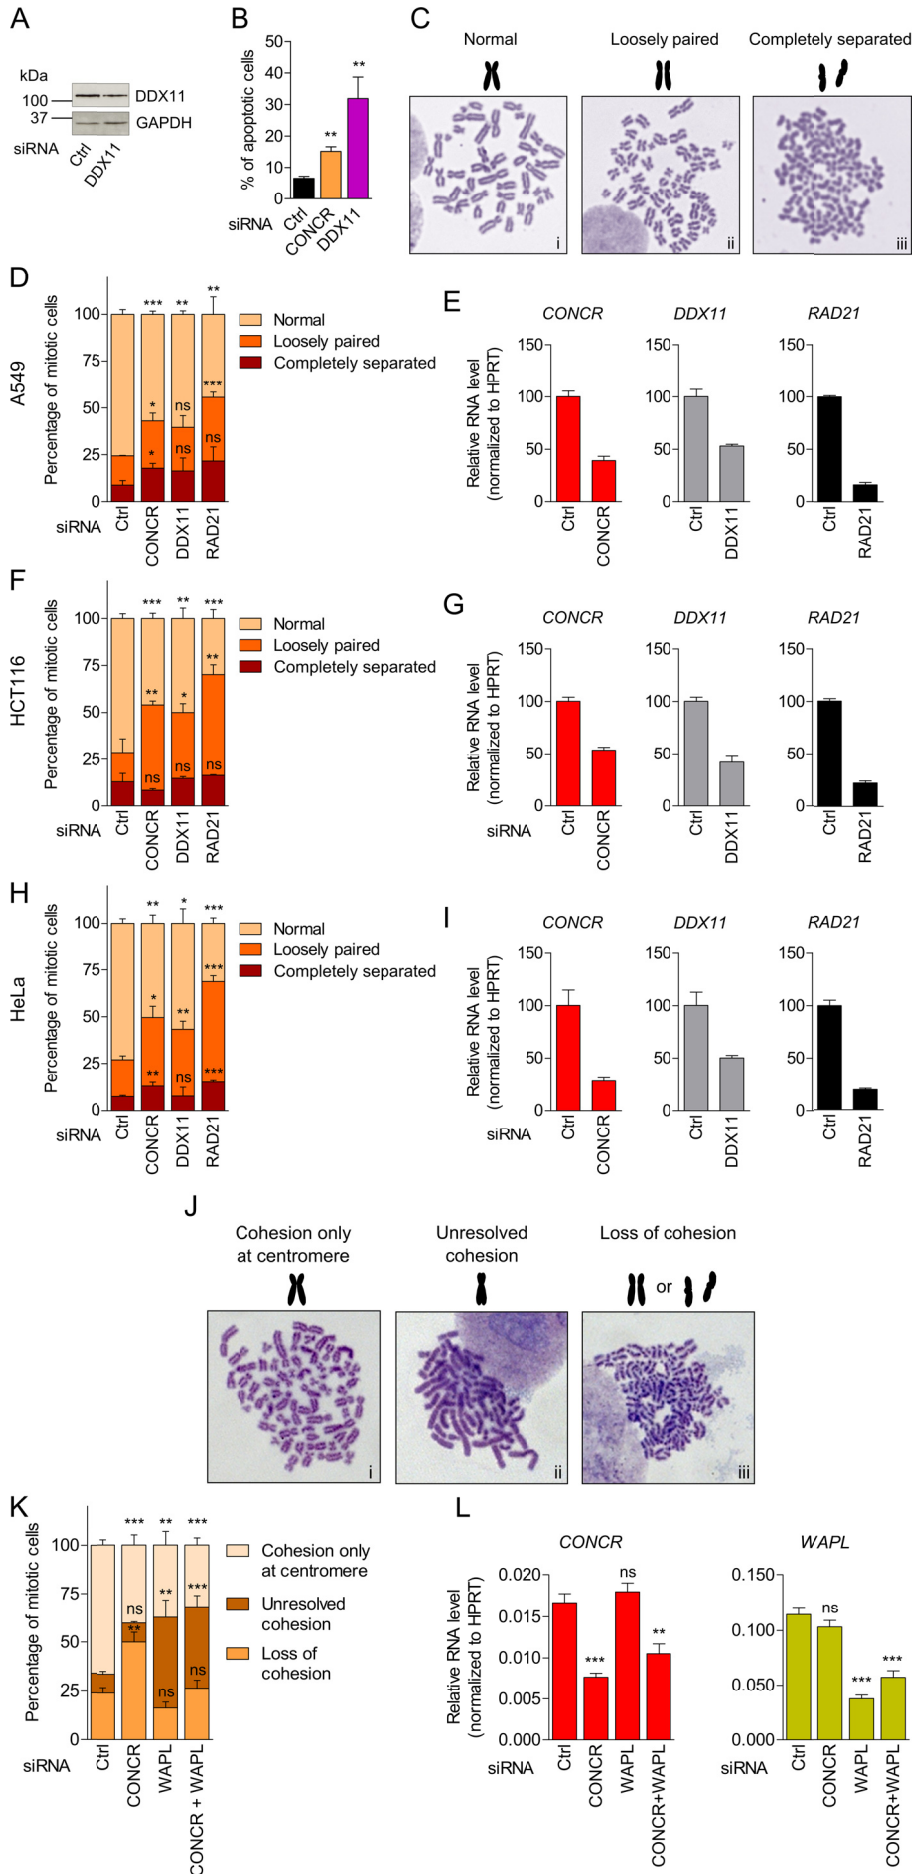



**Figure S3**, related to Figure 4

(A) DDX11 levels in A549 cells transfected with a siRNA-control (Ctrl) or a pool of two siRNAs targeting DDX11.

(B) Percentage of apoptotic cells determined by flow cytometry of annexin V and 7-AAD stained cells.

(C) Representative images of chromosome spreads showing normal X-shaped conformation (i) or cohesion defects in the sister chromatid, classified as “loosely paired” (ii) or “completely separated” (iii).

(D-I) Cells were transfected with a control siRNA (Ctrl) or with siRNA targeting CONCR, DDX11 or RAD21.

(D) Percentage of A549 mitotic cells showing normal sister chromatid cohesion or cohesion defects classified as “loosely paired” or “completely separated”. At least fifty metaphases per condition were scored and each experiment blindly scored twice. Graph shows mean  $\pm$  SD of two independent experiments.

(E) CONCR, DDX11 and RAD21 knockdown efficiencies determined by qRT-PCR.

(F-G) As (D) and (E) in HCT116 cells.

(H-I) As (D) and (E) in HeLa cells.

(J-L) A549 cells were transfected with a control siRNA (Ctrl) or with siRNA targeting either CONCR, WAPL or both (CONCR+WAPL).

(J) Representative images of chromosome spreads showing different cohesion phenotypes, classified as “cohesion only at centromere” (i) “unresolved cohesion” (ii) or “loss of cohesion” (iii) as quantified in (K). At least fifty metaphases per condition were scored and each experiment blindly scored twice. Graph shows mean  $\pm$  SD of three independent experiments.

(L) CONCR, and WAPL knockdown efficiencies determined by qRT-PCR.

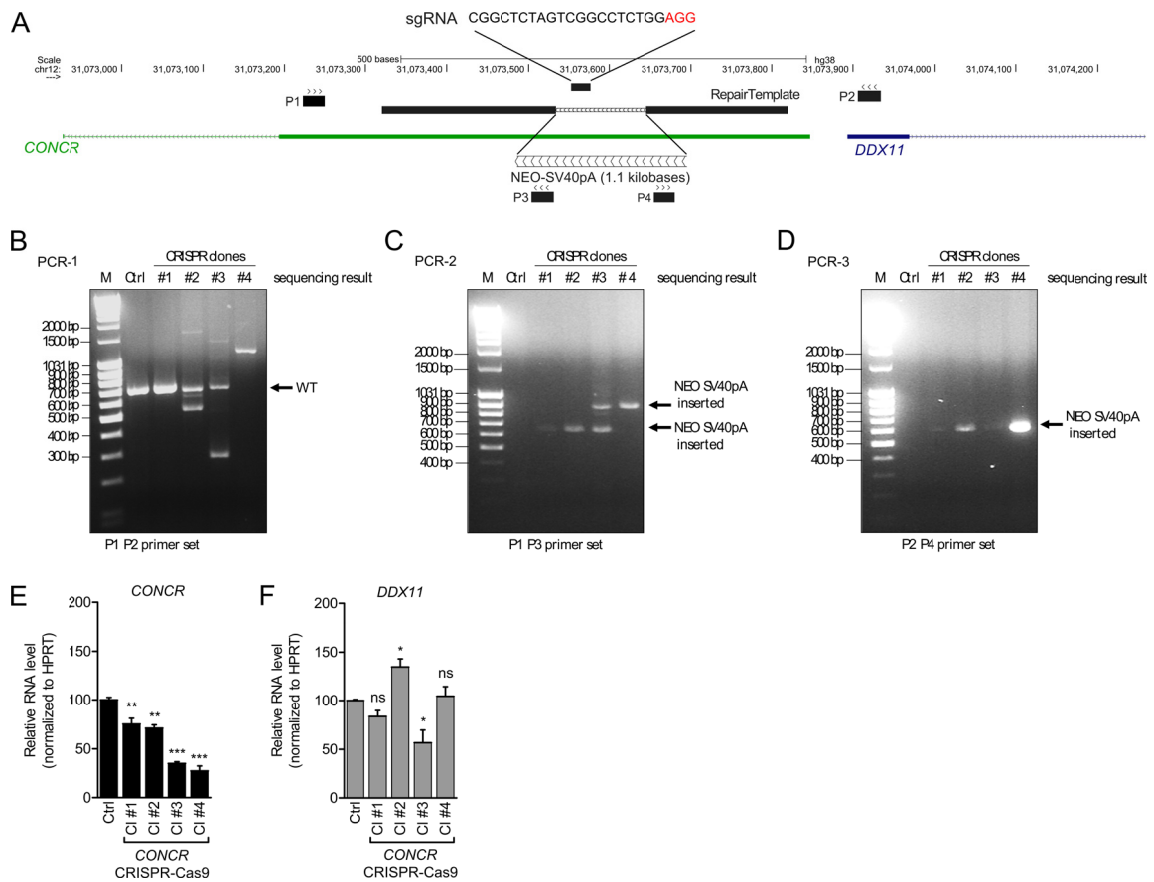

**Figure S4**, related to Figure 4

(A) Schematic of the editing strategy of the CONCR genomic locus by CRISPR-Cas9. The position and sequence of the sgRNA is shown at the top. The repair template used to insert the NEO-SV40pA sequence at the site of cleavage is shown; flanking sequences to the cleavage site are drawn as black lines and the NEO-SV40pA sequence is drawn in white with arrows indicating the orientation. The position and orientation of the primers (P1 to P4) used for the clones screening by PCR (B-D) is shown with black lines and arrows.

(B-D) Screening of the CRISPR clones by PCR and sequencing. (B) Genomic DNA was amplified by PCR using the primer set P1-P2. The bands indicated with the arrow were excised and sequenced confirming the WT sequence. (C) Genomic DNA was amplified by PCR using the primer set P1-P3. The bands indicated with the arrow were excised and sequenced confirming the insertion of the NEO-SV40pA sequence. (D) Genomic DNA was amplified by PCR using the primer set P2-P4. The bands indicated with the arrow were excised and sequenced confirming the insertion of the NEO-SV40pA sequence.

(E-F) CONCR and DDX11 relative levels were determined by qRT-PCR. Graphs show mean  $\pm$  SD of three independent experiments.

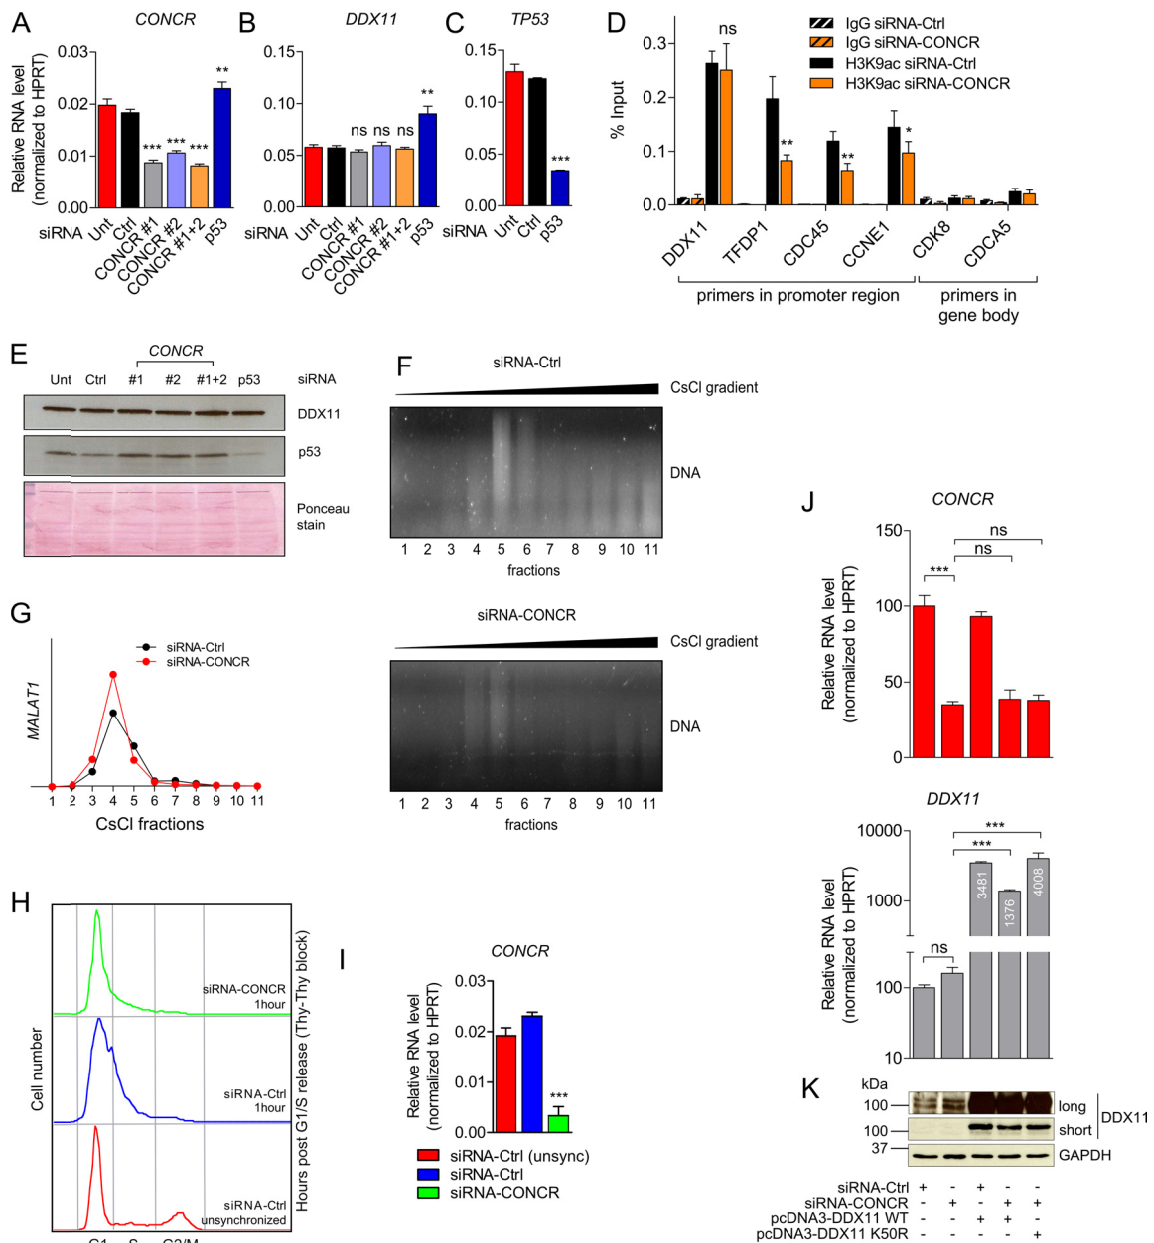

**Figure S5**, related to Figure 5 and Figure 6

(A-C) A549 cells were left untransfected (Unt), transfected with a control siRNA (Ctrl), with two siRNAs targeting *CONCR*, separately (#1 and #2) or in combination (#1+2), or with a siRNA targeting *TP53*. *CONCR*, *DDX11* and *TP53* relative levels were determined by qRT-PCR. Graphs show mean  $\pm$  SEM of three independent experiments. Significance was determined comparing to the siRNA-Ctrl.

(D) H3K9ac ChIP-qRT-PCR in control (siRNA-Ctrl) and *CONCR* depleted cells (siRNA-CONCR).

(E) *DDX11* and p53 levels were determined by western blotting. Ponceau staining was used as loading control.

(F-G) A549 cells were transfected with a siRNA-control (Ctrl) or a pool of two siRNAs targeting *CONCR* and cross-linked cell extracts were fractionated by CsCl density-gradient centrifugation. Protein, DNA and RNA were then isolated (details in experimental procedures). (F) DNA distribution analysed by ethidium bromide staining of agarose gel. (G) MALAT1 qRT-PCR showing enrichment of the lncRNA in the chromatin fractions (fractions 4 and 5).

(H-I) A549 cells were either transfected with a control siRNA (Ctrl) or with two siRNAs targeting CONCR in combination. G1/S synchronized cells were obtained by double thymidine block procedure. Normal medium was then used for the release and cells used for the DDX11 ChIP-seq shown in Figure 5. In parallel, aliquots were collected for cell cycle analysis (H) and RNA expression analysis by qRT-PCR (I). Graph shows mean  $\pm$  SD of two independent experiments, while in (H) cell cycle profiles of one representative experiment are shown.

(J-K) CONCR and DDX11 levels determined by qRT-PCR (J) and western blot (K) in A549 cells transfected with the indicated combinations of siRNAs and DDX11 expression plasmids. Graphs show mean  $\pm$  SD of two independent experiments.

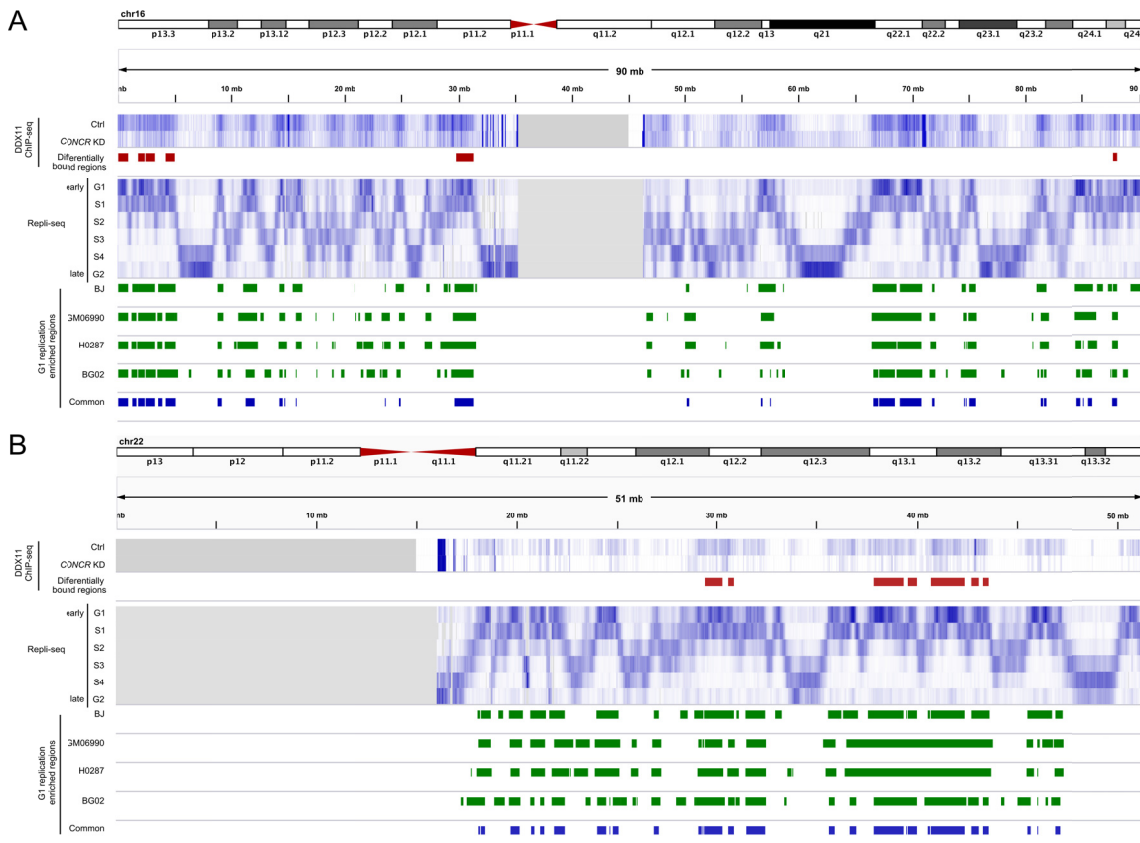

**Figure S6**, related to Figure 5

(A-B) Representative images of the DDX11 ChIP-seq. Entire chromosome 16 (A) and chromosome 22 (B). *Top to bottom*: Chromosome schematic of two representative regions of chr16 and chr22; DDX11 ChIP-seq signal in control (Ctrl) and CONCR depleted cells (KD); regions with differential binding of DDX11 (Ctrl vs KD); signals of DNA replicating regions of BJ cells in G1 to G2 phases of the cell cycle as reported in (Hansen et al., 2010); G1 replication enriched regions common to BJ, GM06990, H0287 and BG02 cell types as reported in (Hansen et al., 2010).

## **SUPPLEMENTAL TABLES**

Table S1. RNA-seq of HCT116 p53+/+ and p53-/-: list of mRNAs and lincRNAs higher in p53-/-, Related to Figure 1.

Table S2. Statistics and TCGA data used in the study, related to Figure 2.

Table S3. Microarray analysis of A549 cells depleted of CONCR, related to Experimental Procedures.

Table S4. CONCR gene expression correlation in lung adenocarcinoma, related to Experimental Procedures.

Table S5. DDX11 ChIP-seq analysis, related to Figure 5.

Table S6. List of oligonucleotides used in the study, related to Figure 1, 2, 3, 4, 5, 6.

## **SUPPLEMENTAL EXPERIMENTAL PROCEDURES**

### **Cross-linked chromatin fractionation by CsCl density-gradient centrifugation**

All steps were performed as previously described (Dellino et al., 2013; Schwartz et al., 2005) with minor modification. A549 cells were cross-linked with formaldehyde to a final concentration of 1% for 10 minutes at room temperature. The reaction was stopped by addition of glycine solution to a final concentration of 125 mM. Cells were harvested by scraping, washed once with PBS and resuspended in sonication buffer (50 mM Tris-HCl pH 8; 10 mM EDTA; 1% SDS; protease inhibitors). The suspension was sonicated (three cycles of 15 sec ON, 30 sec OFF) at medium constant power. The clear lysate was mixed with 6,81 g of CsCl, and the sample volume adjusted to 12 ml with gradient buffer (10mM Tris-HCl pH 7.5; 1 mM EDTA, 0.5 mM EGTA; 0.5% N-lauroylsarcosine). Centrifugation was at 20°C for 72 h at 35900 rpm in a Beckman SW40Ti rotor on a Beckman Optima L100XP. After centrifugation, 12



fractions were collected, crosslinking was reversed at 65°C overnight and protein, RNA and DNA purified by TCA, TRIzol and phenol-chloroform precipitation respectively.

### **Chromatin immunoprecipitation (ChIP)**

RNAi and G1/S synchronization were performed as described above. Briefly, cells were cross-linked with 1% formaldehyde and chromatin prepared by sonication to obtain DNA fragments between 100 bp and 500 bp. DDX11 or H3K9ac bound DNA was then immunoprecipitated using the anti-DDX11 antibody (ab66971, Abcam) or the anti-H3K9ac antibody (ab4441, Abcam), decrosslinked and extracted for analysis by sequencing or qRT-PCR.

### **ChIP sequencing (ChIP-seq)**

For DDX11 ChIP-seq libraries were prepared using the NEBNext Ultra DNA Library Prep Kit (Illumina) and sequenced using the NextSeq 500 system (Illumina) with 50 M reads per sample in average. Unfiltered 75-bp Illumina reads were aligned to the human reference genome (NCBI Build 37, hg19) using Bowtie2 (Langmead and Salzberg, 2012) with the default parameters. FeatureCounts v1.5.0 (Liao et al., 2014) was used to assign and quantify the ChIP-Seq reads aligned to the 867 consensus G1 replication-enriched regions common between BJ, GM06990, H0287 and BG02 cells as defined by the previously published Repli-seq study (Hansen et al., 2010) (Table S5). The regions differentially expressed ( $\log_{2}FC \neq 0$ ) between *CONCR* knockdown and control ChIP-seq data were identified using the Bioconductor package LIMMA (Smyth, 2004).

### **ATP hydrolysis assays**

DDX11 recombinant protein was purified using a protocol previously described (Capo-Chichi et al., 2013). Briefly, pcDNA3-His<sub>6</sub>-DDX11-3xFLAG plasmid containing human DDX11 cDNA was transfected into 293T cells using Lipofectamine 2000. Nuclear extract was incubated with anti-

FLAG affinity resin (Sigma) and eluted with 3X FLAG peptide. Purified recombinant DDX11 migrated as a single band on Coomassie-stained SDS-PAGE. *CONCR* cDNA clone was obtained from OriGene Technologies (cDNA FLJ39041 fis, clone NT2RP7010109) and sequence corresponding to ENST00000618041.1 was subcloned by PCR into pcR4-TOPO (Invitrogen). *CONCR* and control RNA (antisense sequence of *CONCR*) were then obtained by *in vitro* transcription with T3 or T7 RNA polymerase respectively. Effect of *CONCR* and control RNA on ATP hydrolysis was measured using [ $\gamma$ - $^{32}$ P] ATP (PerkinElmer Life Sciences) and analysis by thin layer chromatography on polyethyleneimine-cellulose plates (Mallinckrodt Baker). The standard reaction mixture (20  $\mu$ l total volume) contained 80 nM or the indicated concentration of RNA in 25 mM Hepes pH 7.5, 25 mM potassium acetate, 1 mM magnesium acetate, 1 mM DTT, 100  $\mu$ g/ml bovine serum albumin, 250  $\mu$ M [ $\gamma$ - $^{32}$ P] ATP, and 40 nM DDX11 protein. Reaction mixtures were incubated at 37 °C followed by quench with 50 mM EDTA (final concentration). The reaction mixture was spotted onto a polyethyleneimine-cellulose TLC plate and resolved using 0.5 M LiCl, 1 M formic acid as the carrier solvent. The TLC plate was exposed to a phospho rimaging cassette for 1 h, visualized using a PhosphorImager, and analyzed with ImageQuant software (GE Healthcare Life Sciences).

### **RNA sequencing (RNA-seq)**

Paired-end and strand-specific RNA-seq libraries were prepared from purified poly-A<sup>+</sup> RNA from untreated and 5-FU-treated p53<sup>+/+</sup> and p53<sup>-/-</sup> HCT116 cells for 4 and 12 h, sequenced and analysed as previously described (Sanchez et al., 2014).

### **Western blotting**

Briefly, protein concentrations were estimated by Bradford assay. For western blotting, proteins were separated by SDS-PAGE and transferred to nitrocellulose. The membranes were blocked and probed with the primary antibody, washed and probed with the required

secondary antibody HRP-conjugated. Detection was performed by ECL according to the manufacturer's instructions. The antibodies used were as follows: anti-DDX11 (ab66971, Abcam), anti-WDR5 (ab56919, Abcam), anti-FEN1 (ab17994, Abcam), anti-H3 (4499, Cell Signaling), anti-p53 (sc-126, Santa Cruz Biotechnology), anti-GAPDH (ab9484, Abcam).

### **RNA immunoprecipitation (RIP)**

RNA immunoprecipitation was performed following cross-linking of cells. Cells were cross-linked with 0.5% formaldehyde and lysed with nuclear isolation buffer (1.28 M sucrose, 40 mM Tris-HCl pH 7.5, 20 mM MgCl<sub>2</sub>, 4 % Triton X-100). Nuclei were pelleted by centrifugation at 2,500 x g for 15 min. Nuclear pellet was resuspended in RIP buffer (150 mM KCl, 25 mM Tris-HCl pH 7.4, 5 mM EDTA, 0.5 mM DTT, 0.5% NP-40, supplemented with 1X cOmplete Protease Inhibitor Cocktail (Roche) and SUPERaseIN (Ambion) 10 U/ml) and divided into two fractions for IgG control and IP. Nuclei were then mechanically sheared using a Dounce homogenizer. The anti-DDX11 antibody (ab66971, Abcam) was then added to the nuclear extract and incubated overnight at 4°C with gentle rotation. 50 µl of protein G magnetic beads were added and incubated for 2 h at 4°C with gentle rotation. Beads were collected using a magnet, washed four times with RIP buffer and immunoprecipitated RNA was finally eluted by heating the beads at 70°C for 15 minutes and extracted using TRIzol.

### **Statistical analysis**

Unless specified otherwise in the Figure legend significance was determined by two-tailed unpaired *t* test using GraphPad Prism (ns, not significant, \*  $p < 0.05$ , \*\*  $p < 0.01$ , \*\*\*  $p < 0.001$ ).

### **SUPPLEMENTAL REFERENCES**

Cancer Genome Atlas Research, N. (2014). Comprehensive molecular profiling of lung adenocarcinoma. *Nature* 511, 543-550.

Capo-Chichi, J.M., Bharti, S.K., Sommers, J.A., Yammine, T., Chouery, E., Patry, L., Rouleau, G.A., Samuels, M.E., Hamdan, F.F., Michaud, J.L., *et al.* (2013). Identification and biochemical characterization of a novel mutation in DDX11 causing Warsaw breakage syndrome. *Hum Mutat* 34, 103-107.

Dellino, G.I., Cittaro, D., Piccioni, R., Luzi, L., Banfi, S., Segalla, S., Cesaroni, M., Mendoza-Maldonado, R., Giacca, M., and Pelicci, P.G. (2013). Genome-wide mapping of human DNA-replication origins: levels of transcription at ORC1 sites regulate origin selection and replication timing. *Genome Res* 23, 1-11.

Greene, C.S., Krishnan, A., Wong, A.K., Ricciotti, E., Zelaya, R.A., Himmelstein, D.S., Zhang, R., Hartmann, B.M., Zaslavsky, E., Sealfon, S.C., *et al.* (2015). Understanding multicellular function and disease with human tissue-specific networks. *Nat Genet* 47, 569-576.

Hansen, R.S., Thomas, S., Sandstrom, R., Canfield, T.K., Thurman, R.E., Weaver, M., Dorschner, M.O., Gartler, S.M., and Stamatoyannopoulos, J.A. (2010). Sequencing newly replicated DNA reveals widespread plasticity in human replication timing. *Proc Natl Acad Sci U S A* 107, 139-144.

Kong, L., Zhang, Y., Ye, Z.Q., Liu, X.Q., Zhao, S.Q., Wei, L., and Gao, G. (2007). CPC: assess the protein-coding potential of transcripts using sequence features and support vector machine. *Nucleic Acids Res* 35, W345-349.

Langmead, B., and Salzberg, S.L. (2012). Fast gapped-read alignment with Bowtie 2. *Nat Methods* 9, 357-359.

Liao, Y., Smyth, G.K., and Shi, W. (2014). featureCounts: an efficient general purpose program for assigning sequence reads to genomic features. *Bioinformatics* 30, 923-930.

Sanchez, Y., Segura, V., Marin-Bejar, O., Athie, A., Marchese, F.P., Gonzalez, J., Bujanda, L., Guo, S., Matheu, A., and Huarte, M. (2014). Genome-wide analysis of the human p53 transcriptional network unveils a lncRNA tumour suppressor signature. *Nat Commun* 5, 5812.

Schwartz, Y.B., Kahn, T.G., and Pirrotta, V. (2005). Characteristic low density and shear sensitivity of cross-linked chromatin containing polycomb complexes. *Mol Cell Biol* 25, 432-439.

Smyth, G.K. (2004). Linear models and empirical bayes methods for assessing differential expression in microarray experiments. *Stat Appl Genet Mol Biol* 3, Article3.
